# Supplementary material
Source: PubMed Central journal article supplement (PMC4747422)
Supplement: NIHMS751533-supplement-Supp_Info.pdf [file NIHMS751533-supplement-Supp_Info.pdf]

## LEGENDS TO SUPPLEMENTARY TABLE AND FIGURES

**Table S1. Previously reported 29 non-MHC autosomal SLE loci that were supported at the SNP or locus level [gene(s) of interest  $\pm$  50 kb] in our Stage 1 discovery sample.**

**Figure S1. Quantile–quantile plot of the observed p-values vs. the expected p-values under the null hypothesis.** The black dots represent the p-values for all autosomal common SNPs in Stage 1 discovery sample while the blue ones represent the p-values after removing the SNPs from the xMHC region at 6p21 (the strongest susceptibility locus for SLE). Significant deviation from the null distribution at the tail of the observed distribution, even after the removal of the markers from the xMHC region, suggests the presence of other compelling susceptibility loci. The red line indicates the distribution under the null hypothesis.

**Figure S2. Manhattan plot showing the distribution of genome-wide association p-values for SLE in Stage 1 discovery sample for the common markers across 22 autosomal chromosomes.**

The blue and red lines indicate  $P=5 \times 10^{-8}$  and  $P=5 \times 10^{-6}$ , respectively.

**Figure S3. The SNP-centric eQTL analysis (cis-eQTL - SNP) results for the SNPs of interest at the 12q12 locus.** The Genevar database was utilized to visualize the eQTL association patterns within our region of interest (<http://www.sanger.ac.uk/resources/software/genevar/>). The results were derived from the data obtained from the Multiple Tissue Human Expression Resource (MuTHER) on genetic variation and gene expression profiling [tissues: adipose (A-red), lymphoblastoid cell lines (L-blue), and skin (S-green)]. Observed SNP-probe associations are shown in a 2-Mb region (within 1-Mb on either side of the interrogated SNP). Genes/probes evaluated for all 4 SNPs included *GXYLT1*, *YAF2* (3 probes), *ZCRB1*, *PPHLN1* (3 probes), *PRICKLE1*, *ADAMTS20* (3 probes), and *PUS7L*. The evaluation of two additional genes/probes (*IRAK4* and *PTK9*) was available for only rs1914490

due to their long distance (>1-Mb) from the remaining SNPs. The analysis was performed using an external algorithm (preloaded). Significant probes (genes) are labeled for each SNP. The dotted line represents the p-value threshold of 0.05.

**Figure S4. The gene-centric eQTL analysis (cis-eQTL - Gene) results in adipose tissue for the genes of interest at the 12q12 locus.** The Genevar database was used to visualize the eQTL association patterns (<http://www.sanger.ac.uk/resources/software/genevar/>). The results were derived from the data obtained from the Multiple Tissue Human Expression Resource (MuTHER) on genetic variation and gene expression profiling. The analysis was performed using an external algorithm (preloaded). Observed eQTL SNPs (eSNPs) are shown in a 2-Mb window around a given probe/gene. Whenever our region of interest (NCBI36/hg18; chr12: 41417152-41500751) overlapped with 'the most relevant cis-eQTL SNPs region' for the implicated genes, a rectangle was used to mark our region of interest. *PPHLN1* and *ADAMTS20* had two additional probes for which the results are not shown. The dotted line represents the p-value threshold of 0.05.

**Figure S5. The gene-centric eQTL analysis (cis-eQTL - Gene) results in lymphoblastoid cell lines for the genes of interest at the 12q12 locus.** The Genevar database was used to visualize the eQTL association patterns (<http://www.sanger.ac.uk/resources/software/genevar/>). The results were derived from the data obtained from the Multiple Tissue Human Expression Resource (MuTHER) on genetic variation and gene expression profiling. The analysis was performed using an external algorithm (preloaded). Observed eQTL SNPs (eSNPs) are shown in a 2-Mb window around a given probe/gene. Whenever our region of interest (NCBI36/hg18; chr12: 41417152-41500751) overlapped with 'the most relevant cis-eQTL SNPs region' for the implicated genes, a rectangle was used to mark our region of interest. *PPHLN1* and *ADAMTS20* had two additional probes for which the results are not shown. The dotted line represents the p-value threshold of 0.05.

**Figure S6. The SNP-centric mQTL analysis results for the SNPs of interest at the 12q12 locus.**

The Genevar database was utilized to visualize the mQTL association patterns within our region of interest (<http://www.sanger.ac.uk/resources/software/genevar/>). The results were derived from the data obtained from the Multiple Tissue Human Expression Resource (MuTHER) on genetic variation and DNA methylation profiling (tissue: adipose). The mQTL analysis included the association testing between methylation levels and common variants (MAF>0.05) located close to the probes (probe  $\pm$  100 kb). The analysis was performed using an external algorithm (preloaded). Significant probes are labeled for each SNP. The dotted line represents the p-value threshold of 0.05.

**Figure S7. Expression profiles of *ZCRB1*, *PPHLN1*, and *IRAK4* in human cells/tissues.** The

expression profiles were obtained from BioGPS gene annotation portal (<http://biogps.org/#goto=welcome>).

**Figure S8. Expression profiles of *PRICKLE1* and *ADAMTS20* in human cells/tissues.** The

expression profiles were obtained from BioGPS gene annotation portal (<http://biogps.org/#goto=welcome>).

**Figure S9. The enhancer enrichment analysis results for the SNPs of interest and their proxies (with category 1 or 2 RegulomeDB scores) at the 12q12 locus.** HaploReg v2

(<http://www.broadinstitute.org/mammals/haploreg/haploreg.php>) was used to perform enhancer enrichment analysis for 4 SNPs of interest (rs10506216, rs1356422, rs11181677, rs1914490) and 3 proxy SNPs (rs868765, rs2897590, rs870972) falling into RegulomeDB categories 1 or 2 (see Methods and Results sections).

**Table S1. Previously reported 29 non-MHC autosomal SLE loci that were supported at the SNP or locus level [gene(s) of interest ± 50 kb] in our Stage 1 discovery sample**

| Locus / Gene(s)     | Chr    | Band             | SNP*              | Position in bp (hg19) | Allele | Freq Cases (n=661) | Freq Controls (n=487) | OR       | P**            | Nearest Gene***     | Location in the Gene**** | RegulomeDB score***** |
|---------------------|--------|------------------|-------------------|-----------------------|--------|--------------------|-----------------------|----------|----------------|---------------------|--------------------------|-----------------------|
| <b>FCGR locus</b>   | 1      | q23.3            | rs12722986        | 161465420             | G      | 0.139              | 0.163                 | 0.721    | 0.0215         | <i>FCGR2A</i>       |                          | 6                     |
|                     | 1      | q23.3            | rs12746613        | 161467042             | A      | 0.133              | 0.155                 | 0.735    | 0.0318         | <i>FCGR2A</i>       |                          | 6                     |
|                     | 1      | q23.3            | rs867624          | 161467837             | T      | 0.133              | 0.155                 | 0.735    | 0.0318         | <i>FCGR2A</i>       |                          | 1f                    |
|                     | 1      | q23.3            | rs7552317         | 161479438             | T      | 0.126              | 0.154                 | 0.652    | 4.66E-03       | <i>FCGR2A</i>       | intron                   | ND                    |
| <b>TNFSF4</b>       | 1      | q25.1            | rs844645          | 173210090             | G      | 0.486              | 0.431                 | 1.222    | 0.0388         | <i>LOC100506023</i> | intron                   | ND                    |
| <b>NCF2</b>         | 1      | q25.3            | rs3768591         | 183501774             | G      | 0.042              | 0.061                 | 0.6      | 0.0261         | <i>SMG7</i>         | intron                   | 6                     |
|                     | 1      | q25.3            | rs3754517         | 183562517             | C      | 0.392              | 0.449                 | 0.805    | 0.0270         | <i>NCF2</i>         |                          | 1f                    |
|                     | 1      | q25.3            | rs10797891        | 183563808             | C      | 0.403              | 0.456                 | 0.823    | 0.0438         | <i>NCF2</i>         |                          | 6                     |
|                     | 1      | q25.3            | rs2333685         | 183565989             | C      | 0.362              | 0.417                 | 0.789    | 0.0184         | <i>NCF2</i>         |                          | 6                     |
|                     | 1      | q25.3            | rs2333686         | 183566100             | A      | 0.372              | 0.429                 | 0.776    | 0.0129         | <i>NCF2</i>         |                          | 6                     |
|                     | 1      | q25.3            | rs41439047        | 183566913             | T      | 0.332              | 0.384                 | 0.808    | 0.0372         | <i>NCF2</i>         |                          | 5                     |
|                     | 1      | q25.3            | rs2761559         | 183580279             | T      | 0.386              | 0.437                 | 0.813    | 0.0332         | <i>ARPC5</i>        |                          | 1f                    |
|                     | 1      | q25.3            | rs2761560         | 183580370             | T      | 0.385              | 0.438                 | 0.803    | 0.0238         | <i>ARPC5</i>        |                          | 1f                    |
|                     | 1      | q25.3            | rs2761561         | 183580653             | G      | 0.385              | 0.437                 | 0.81     | 0.0295         | <i>ARPC5</i>        |                          | 6                     |
|                     | 1      | q25.3            | rs2761565         | 183581402             | A      | 0.390              | 0.438                 | 0.823    | 0.0454         | <i>ARPC5</i>        |                          | 6                     |
|                     | 1      | q25.3            | rs16861241        | 183589167             | T      | 0.025              | 0.039                 | 0.549    | 0.0371         | <i>ARPC5</i>        |                          | 4                     |
|                     | 1      | q25.3            | rs16861243        | 183589382             | A      | 0.025              | 0.038                 | 0.562    | 0.0455         | <i>ARPC5</i>        |                          | 3a                    |
|                     | 1      | q25.3            | rs10797896        | 183589800             | G      | 0.025              | 0.038                 | 0.564    | 0.0472         | <i>ARPC5</i>        |                          | ND                    |
|                     | 1      | q25.3            | rs16861259        | 183593328             | A      | 0.025              | 0.038                 | 0.564    | 0.0472         | <i>ARPC5</i>        |                          | ND                    |
|                     | 1      | q25.3            | rs12043560        | 183594102             | T      | 0.025              | 0.038                 | 0.564    | 0.0472         | <i>ARPC5</i>        |                          | 5                     |
|                     | 1      | q25.3            | rs4652822         | 183598350             | T      | 0.328              | 0.380                 | 0.807    | 0.0395         | <i>ARPC5</i>        | intron                   | 1f                    |
|                     | 1      | q25.3            | rs17436125        | 183601331             | T      | 0.329              | 0.388                 | 0.773    | 0.0142         | <i>ARPC5</i>        | intron                   | 1f                    |
| 1                   | q25.3  | rs2254972        | 183602795         | G                     | 0.409  | 0.476              | 0.756                 | 3.75E-03 | <i>ARPC5</i>   | intron              | 1f                       |                       |
| 1                   | q25.3  | rs6673809        | 183603060         | A                     | 0.025  | 0.038              | 0.566                 | 0.0482   | <i>ARPC5</i>   | intron              | 4                        |                       |
| <b>IL10</b>         | 1      | q32.1            | <b>rs3024505</b>  | 206939904             | T      | 0.173              | 0.156                 | 1.3      | 0.0414         | <i>IL10</i>         |                          | 2b                    |
| <b>RASGRP3</b>      | 2      | p22.3            | rs2034693         | 33623306              | G      | 0.449              | 0.506                 | 0.773    | 8.76E-03       | <i>LTBP1</i>        | intron                   | 5                     |
|                     | 2      | p22.3            | rs662050          | 33627842              | G      | 0.239              | 0.302                 | 0.676    | 3.70E-04       | <i>LTBP1</i>        |                          | ND                    |
|                     | 2      | p22.3            | rs1869452         | 33630276              | C      | 0.377              | 0.413                 | 0.81     | 0.0327         | <i>LTBP1</i>        |                          | 5                     |
|                     | 2      | p22.3            | rs588252          | 33631442              | T      | 0.238              | 0.283                 | 0.75     | 9.34E-03       | <i>LTBP1</i>        |                          | ND                    |
|                     | 2      | p22.3            | rs11680631        | 33694912              | G      | 0.389              | 0.425                 | 0.801    | 0.0344         | <i>RASGRP3</i>      | intron                   | 6                     |
|                     | 2      | p22.3            | rs17648308        | 33703217              | G      | 0.117              | 0.144                 | 0.722    | 0.0264         | <i>RASGRP3</i>      | intron                   | 4                     |
|                     | 2      | p22.3            | rs11687036        | 33753366              | T      | 0.451              | 0.412                 | 1.236    | 0.0316         | <i>RASGRP3</i>      | intron                   | ND                    |
|                     | 2      | p22.3            | rs13391166        | 33805314              | C      | 0.505              | 0.469                 | 1.22     | 0.0427         | <i>FAM98A</i>       |                          | ND                    |
|                     | 2      | p22.3            | rs11066           | 33809294              | A      | 0.208              | 0.262                 | 0.683    | 1.12E-03       | <i>FAM98A</i>       |                          | 5                     |
|                     | 2      | p22.3            | rs6708570         | 33815384              | A      | 0.210              | 0.260                 | 0.705    | 2.94E-03       | <i>FAM98A</i>       |                          | 6                     |
| <b>TET3</b>         | 2      | p13.1            | rs4384817         | 74226141              | A      | 0.072              | 0.042                 | 1.835    | 5.26E-03       | <i>TET3</i>         | intron                   | ND                    |
| <b>STAT4</b>        | 2      | q32.2            | rs34997637        | 191858830             | T      | 0.269              | 0.213                 | 1.333    | 0.0126         | <i>STAT1</i>        | intron                   | 4                     |
|                     | 2      | q32.2            | rs10167514        | 191860529             | T      | 0.270              | 0.213                 | 1.345    | 0.0102         | <i>STAT1</i>        | intron                   | 1f                    |
|                     | 2      | q32.2            | rs2030171         | 191869163             | A      | 0.386              | 0.303                 | 1.301    | 9.76E-03       | <i>STAT1</i>        | intron                   | 5                     |
|                     | 2      | q32.2            | rs10199181        | 191873553             | T      | 0.439              | 0.359                 | 1.362    | 2.00E-03       | <i>STAT1</i>        | intron                   | 5                     |
|                     | 2      | q32.2            | rs13029532        | 191875901             | G      | 0.069              | 0.082                 | 0.617    | 0.0115         | <i>STAT1</i>        | intron                   | 3a                    |
|                     | 2      | q32.2            | rs16833177        | 191887632             | C      | 0.246              | 0.180                 | 1.345    | 0.0163         | <i>STAT4</i>        |                          | 4                     |
|                     | 2      | q32.2            | rs3024912         | 191893087             | C      | 0.271              | 0.202                 | 1.342    | 0.0125         | <i>STAT4</i>        |                          | 6                     |
|                     | 2      | q32.2            | rs3024903         | 191895607             | T      | 0.095              | 0.110                 | 0.715    | 0.0367         | <i>STAT4</i>        | intron                   | 4                     |
|                     | 2      | q32.3            | <b>rs3821236</b>  | 191902758             | T      | 0.265              | 0.175                 | 1.647    | 3.78E-05       | <i>STAT4</i>        | intron                   | 5                     |
|                     | 2      | q32.3            | rs11676659        | 191919354             | C      | 0.047              | 0.061                 | 0.557    | 0.0113         | <i>STAT4</i>        | intron                   | 5                     |
|                     | 2      | q32.3            | <b>rs11893432</b> | 191921874             | G      | 0.258              | 0.176                 | 1.562    | 2.47E-04       | <i>STAT4</i>        | intron                   | 5                     |
|                     | 2      | q32.3            | rs3024861         | 191924606             | T      | 0.322              | 0.243                 | 1.316    | 0.0132         | <i>STAT4</i>        | intron                   | 5                     |
|                     | 2      | q32.3            | rs1517352         | 191931464             | A      | 0.457              | 0.395                 | 1.232    | 0.0422         | <i>STAT4</i>        | intron                   | 5                     |
|                     | 2      | q32.3            | rs7594501         | 191938600             | T      | 0.053              | 0.080                 | 0.518    | 1.72E-03       | <i>STAT4</i>        | intron                   | 6                     |
|                     | 2      | q32.3            | <b>rs7601754</b>  | 191940451             | G      | 0.148              | 0.207                 | 0.567    | 1.71E-05       | <i>STAT4</i>        | intron                   | 5                     |
|                     | 2      | q32.3            | <b>rs6434435</b>  | 191953864             | A      | 0.135              | 0.195                 | 0.575    | 5.93E-05       | <i>STAT4</i>        | intron                   | 6                     |
|                     | 2      | q32.3            | <b>rs10931480</b> | 191954047             | C      | 0.147              | 0.206                 | 0.582    | 4.85E-05       | <i>STAT4</i>        | intron                   | ND                    |
| 2                   | q32.3  | <b>rs4274624</b> | 191958656         | C                     | 0.321  | 0.214              | 1.784                 | 4.48E-07 | <i>STAT4</i>   | intron              | 5                        |                       |
| 2                   | q32.3  | <b>rs7582694</b> | 191970120         | C                     | 0.327  | 0.216              | 1.811                 | 3.59E-07 | <i>STAT4</i>   | intron              | 4                        |                       |
| 2                   | q32.3  | rs16833260       | 191971565         | C                     | 0.400  | 0.313              | 1.385                 | 2.05E-03 | <i>STAT4</i>   | intron              | ND                       |                       |
| <b>PXK</b>          | 3      | p14.3            | rs11706920        | 58279672              | T      | 0.092              | 0.065                 | 1.451    | 0.0435         | <i>ABHD6</i>        | exon-3'UTR               | 1f                    |
|                     | 3      | p14.3            | rs1045115         | 58305199              | T      | 0.094              | 0.065                 | 1.47     | 0.0362         | <i>RPP14</i>        | exon-3'UTR               | 6                     |
|                     | 3      | p14.3            | rs7643185         | 58311158              | A      | 0.095              | 0.065                 | 1.478    | 0.0327         | <i>RPP14</i>        |                          | 1f                    |
|                     | 3      | p14.3            | rs9864325         | 58336846              | C      | 0.096              | 0.068                 | 1.458    | 0.0373         | <i>PXK</i>          | intron                   | 1f                    |
|                     | 3      | p14.3            | rs9850717         | 58351875              | T      | 0.096              | 0.065                 | 1.532    | 0.0206         | <i>PXK</i>          | intron                   | 6                     |
| 3                   | p14.3  | rs9864824        | 58394835          | A                     | 0.092  | 0.065              | 1.464                 | 0.0405   | <i>PXK</i>     | intron              | 1f                       |                       |
| <b>TMEM39A/CD80</b> | 3      | q13.33           | rs747001          | 119102496             | G      | 0.041              | 0.028                 | 1.719    | 0.0458         | <i>ARHGAP31</i>     | intron                   | ND                    |
|                     | 3      | q13.33           | rs1000199         | 119113762             | A      | 0.125              | 0.098                 | 1.558    | 4.36E-03       | <i>ARHGAP31</i>     | intron                   | ND                    |
|                     | 3      | q13.33           | rs12495749        | 119129528             | G      | 0.190              | 0.166                 | 1.329    | 0.0233         | <i>ARHGAP31</i>     | intron                   | 6                     |
|                     | 3      | q13.33           | rs16829838        | 119138675             | A      | 0.190              | 0.166                 | 1.329    | 0.0233         | <i>ARHGAP31</i>     |                          | 1f                    |
|                     | 3      | q13.33           | rs7430156         | 119161982             | G      | 0.416              | 0.447                 | 0.814    | 0.0384         | <i>TMEM39A</i>      | intron                   | ND                    |
|                     | 3      | q13.33           | rs16829853        | 119165650             | T      | 0.190              | 0.166                 | 1.334    | 0.0218         | <i>TMEM39A</i>      | intron                   | 6                     |
|                     | 3      | q13.33           | rs4688007         | 119198873             | G      | 0.204              | 0.242                 | 0.772    | 0.0307         | <i>POGLUT1</i>      | exon                     | 6                     |
| 3                   | q13.33 | rs1967621        | 119225082         | G                     | 0.202  | 0.233              | 0.781                 | 0.0426   | <i>TIMMDC1</i> | intron              | 6                        |                       |
| <b>AFF1</b>         | 4      | q21.3            | rs17012341        | 87983116              | A      | 0.024              | 0.012                 | 2.648    | 8.96E-03       | <i>AFF1</i>         | intron                   | 6                     |
|                     | 4      | q21.3            | rs10021879        | 87987215              | T      | 0.024              | 0.011                 | 2.751    | 8.73E-03       | <i>AFF1</i>         | intron                   | ND                    |

| Locus / Gene(s)       | Chr                     | Band      | SNP*       | Position in bp (hg19) | Allele   | Freq Cases (n=661) | Freq Controls (n=487) | OR     | P**      | Nearest Gene*** | Location in the Gene**** | RegulomeDB score***** |
|-----------------------|-------------------------|-----------|------------|-----------------------|----------|--------------------|-----------------------|--------|----------|-----------------|--------------------------|-----------------------|
| <b>BANK1</b>          | 4                       | q22.1     | rs236988   | 88013680              | G        | 0.024              | 0.012                 | 2.561  | 0.0116   | AFF1            | intron                   | 3a                    |
|                       | 4                       | q22.1     | rs236990   | 88015386              | C        | 0.026              | 0.012                 | 2.702  | 7.25E-03 | AFF1            | intron                   | 5                     |
|                       | 4                       | q24       | rs6833249  | 102726073             | T        | 0.090              | 0.103                 | 0.66   | 0.0189   | BANK1           | intron                   | 6                     |
|                       | 4                       | q24       | rs4385063  | 102831285             | A        | 0.102              | 0.120                 | 0.69   | 0.0243   | BANK1           | intron                   | ND                    |
|                       | 4                       | q24       | rs4337734  | 102832228             | C        | 0.104              | 0.122                 | 0.696  | 0.0259   | BANK1           | intron                   | 3a                    |
|                       | 4                       | q24       | rs1809578  | 102852575             | C        | 0.107              | 0.126                 | 0.706  | 0.0295   | BANK1           | intron                   | ND                    |
|                       | 4                       | q24       | rs918363   | 102852939             | A        | 0.108              | 0.129                 | 0.687  | 0.0190   | BANK1           | intron                   | 4                     |
|                       | 4                       | q24       | rs2631271  | 102914396             | A        | 0.108              | 0.129                 | 0.696  | 0.0231   | BANK1           | intron                   | 5                     |
| <b>TNIP1</b>          | 4                       | q24       | rs6853274  | 102941663             | T        | 0.025              | 0.039                 | 0.526  | 0.0313   | BANK1           | intron                   | ND                    |
|                       | 4                       | q24       | rs2631265  | 102945076             | A        | 0.107              | 0.118                 | 0.732  | 0.0442   | BANK1           | intron                   | 6                     |
|                       | 5                       | q33.1     | rs11747116 | 150427285             | G        | 0.477              | 0.449                 | 1.222  | 0.0444   | TNIP1           | intron                   | 5                     |
|                       | 5                       | q33.1     | rs4958435  | 150438284             | T        | 0.495              | 0.437                 | 1.266  | 0.0174   | TNIP1           | intron                   | 1f                    |
|                       | 5                       | q33.1     | rs2233287  | 150440097             | A        | 0.098              | 0.072                 | 1.521  | 0.0156   | TNIP1           | intron                   | 2b                    |
|                       | 5                       | q33.1     | rs6869605  | 150452866             | G        | 0.158              | 0.108                 | 1.494  | 5.25E-03 | TNIP1           | intron                   | 5                     |
|                       | 5                       | q33.1     | rs4958882  | 150454787             | G        | 0.155              | 0.106                 | 1.539  | 3.10E-03 | TNIP1           | intron                   | ND                    |
|                       | 5                       | q33.1     | rs3792784  | 150455672             | C        | 0.126              | 0.091                 | 1.565  | 4.11E-03 | TNIP1           | intron                   | 4                     |
| <b>SNRPC/UHRF1BP1</b> | 5                       | q33.1     | rs3792783  | 150455732             | G        | 0.195              | 0.139                 | 1.474  | 3.27E-03 | TNIP1           | intron                   | 4                     |
|                       | 5                       | q33.1     | rs13168551 | 150462638             | G        | 0.454              | 0.383                 | 1.248  | 0.0262   | TNIP1           | intron                   | 4                     |
|                       | 6                       | p21.31    | rs6932930  | 34677103              | C        | 0.254              | 0.216                 | 1.349  | 0.0126   | C6orf106        |                          | 5                     |
|                       | 6                       | p21.31    | rs2477508  | 34703695              | A        | 0.412              | 0.327                 | 1.299  | 0.0130   | SNRPC           |                          | ND                    |
|                       | 6                       | p21.31    | rs2764211  | 34704613              | C        | 0.408              | 0.326                 | 1.314  | 8.92E-03 | SNRPC           |                          | 5                     |
|                       | 6                       | p21.31    | rs2764199  | 34706982              | G        | 0.261              | 0.222                 | 1.336  | 0.0119   | SNRPC           |                          | 5                     |
|                       | 6                       | p21.31    | rs2814971  | 34714209              | A        | 0.405              | 0.324                 | 1.295  | 0.0131   | SNRPC           |                          | 4                     |
|                       | 6                       | p21.31    | rs2764208  | 34714322              | G        | 0.410              | 0.326                 | 1.324  | 7.34E-03 | SNRPC           |                          | 5                     |
|                       | 6                       | p21.31    | rs1998702  | 34741917              | G        | 0.406              | 0.327                 | 1.31   | 9.66E-03 | SNRPC           |                          | 5                     |
|                       | 6                       | p21.31    | rs10947531 | 34765118              | A        | 0.405              | 0.326                 | 1.309  | 9.91E-03 | UHRF1BP1        | intron                   | 5                     |
|                       | 6                       | p21.31    | rs9296129  | 34774414              | C        | 0.406              | 0.326                 | 1.316  | 8.56E-03 | UHRF1BP1        | intron                   | 2b                    |
|                       | 6                       | p21.31    | rs7774697  | 34791027              | C        | 0.405              | 0.326                 | 1.309  | 9.91E-03 | UHRF1BP1        | intron                   | 6                     |
|                       | 6                       | p21.31    | rs6906129  | 34801160              | G        | 0.413              | 0.330                 | 1.349  | 4.84E-03 | UHRF1BP1        | intron                   | 5                     |
|                       | 6                       | p21.31    | rs9469914  | 34827693              | T        | 0.403              | 0.327                 | 1.28   | 0.0187   | UHRF1BP1        | intron                   | 5                     |
|                       | 6                       | p21.31    | rs4646949  | 34845449              | C        | 0.349              | 0.268                 | 1.313  | 0.0127   | UHRF1BP1        |                          | 6                     |
|                       | 6                       | p21.31    | rs13219624 | 34861799              | A        | 0.194              | 0.151                 | 1.395  | 0.0110   | ANKS1A          | intron                   | 6                     |
|                       | 6                       | p21.31    | rs9296139  | 34874002              | G        | 0.194              | 0.151                 | 1.399  | 0.0103   | ANKS1A          | intron                   | 1f                    |
|                       | 6                       | p21.31    | rs6941065  | 34879203              | G        | 0.096              | 0.067                 | 1.437  | 0.0460   | ANKS1A          | intron                   | 5                     |
| 6                     | p21.31                  | rs7753949 | 34882394   | T                     | 0.349    | 0.269              | 1.322                 | 0.0118 | ANKS1A   | intron          | 1f                       |                       |
| 6                     | p21.31                  | rs9380470 | 34886436   | G                     | 0.068    | 0.039              | 1.774                 | 0.0108 | ANKS1A   | intron          | 5                        |                       |
| <b>PRDM1/ATG5</b>     | 6                       | q21       | rs9386510  | 106521653             | G        | 0.220              | 0.194                 | 1.326  | 0.0166   | PRDM1           |                          | ND                    |
|                       | 6                       | q21       | rs9372117  | 106529777             | G        | 0.339              | 0.316                 | 1.236  | 0.0400   | PRDM1           |                          | 5                     |
|                       | 6                       | q21       | rs17066908 | 106821193             | G        | 0.043              | 0.026                 | 1.808  | 0.0350   | ATG5            |                          | 4                     |
|                       | 6                       | q21       | rs17066910 | 106821393             | A        | 0.043              | 0.026                 | 1.817  | 0.0338   | ATG5            |                          | 5                     |
|                       | 6                       | q21       | rs17066916 | 106822546             | G        | 0.043              | 0.026                 | 1.804  | 0.0356   | ATG5            |                          | ND                    |
| <b>OLIG3 /TNFAIP3</b> | 6                       | q23.3     | rs1360605  | 137800894             | G        | 0.030              | 0.045                 | 0.556  | 0.0324   | OLIG3           |                          | ND                    |
|                       | 6                       | q23.3     | rs595985   | 137926327             | A        | 0.226              | 0.245                 | 0.764  | 0.0240   | OLIG3           |                          | ND                    |
|                       | 6                       | q23.3     | rs494739   | 137927444             | T        | 0.218              | 0.225                 | 0.778  | 0.0495   | OLIG3           |                          | 6                     |
|                       | 6                       | q23.3     | rs2327832  | 137973068             | G        | 0.205              | 0.167                 | 1.346  | 0.0161   | OLIG3           |                          | 6                     |
|                       | 6                       | q23.3     | rs6920220  | 138006504             | A        | 0.205              | 0.172                 | 1.321  | 0.0225   | LOC100130476    |                          | 6                     |
|                       | 6                       | q23.3     | rs7746779  | 138154501             | C        | 0.159              | 0.199                 | 0.721  | 0.0117   | LOC100130476    | intron                   | 6                     |
|                       | 6                       | q23.3     | rs11970361 | 138179136             | A        | 0.041              | 0.051                 | 0.614  | 0.0433   | LOC100130476    | intron                   | ND                    |
|                       | 6                       | q23.3     | rs5029938  | 138195633             | T        | 0.042              | 0.054                 | 0.609  | 0.0382   | TNFAIP3         | intron                   | 2b                    |
| 6                     | q23.3                   | rs7749323 | 138230389  | T                     | 0.054    | 0.033              | 1.625                 | 0.0483 | TNFAIP3  |                 | 4                        |                       |
| <b>JAZF1</b>          | 7                       | p15.2     | rs7791865  | 27959430              | A        | 0.074              | 0.095                 | 0.701  | 0.0441   | JAZF1           | intron                   | 5                     |
|                       | 7                       | p15.1     | rs4722753  | 28106929              | C        | 0.435              | 0.479                 | 0.746  | 2.71E-03 | JAZF1           | intron                   | 5                     |
|                       | 7                       | p15.1     | rs6965411  | 28114036              | G        | 0.391              | 0.429                 | 0.745  | 4.43E-03 | JAZF1           | intron                   | 5                     |
| <b>HIP1</b>           | 7                       | q11.23    | rs237238   | 75211414              | G        | 0.058              | 0.089                 | 0.654  | 0.0263   | HIP1            | exon-synonymous          | 5                     |
| <b>IRF5/TNPO3</b>     | 7                       | q32.1     | rs12531711 | 128617466             | G        | 0.169              | 0.122                 | 1.525  | 3.93E-03 | TNPO3           | intron                   | 6                     |
|                       | 7                       | q32.1     | rs1154330  | 128625788             | G        | 0.124              | 0.147                 | 0.693  | 0.0135   | TNPO3           | intron                   | 6                     |
|                       | 7                       | q32.1     | rs17166957 | 128687487             | G        | 0.019              | 0.011                 | 2.496  | 0.0180   | TNPO3           | intron                   | 6                     |
|                       | 7                       | q32.1     | rs17424602 | 128687940             | G        | 0.168              | 0.122                 | 1.517  | 4.42E-03 | TNPO3           | intron                   | 5                     |
|                       | <b>XKR6/FAM167A/BLK</b> | 8         | p23.1      | rs1991651             | 10706411 | G                  | 0.442                 | 0.384  | 1.32     | 4.57E-03        | PINX1                    |                       |
| 8                     |                         | p23.1     | rs877116   | 10712945              | G        | 0.470              | 0.423                 | 1.27   | 0.0136   | PINX1           |                          | 1f                    |
| 8                     |                         | p23.1     | rs17777835 | 10718061              | T        | 0.313              | 0.361                 | 0.775  | 0.0157   | PINX1           |                          | ND                    |
| 8                     |                         | p23.1     | rs17721796 | 10729454              | C        | 0.135              | 0.171                 | 0.766  | 0.0477   | XKR6            |                          | ND                    |
| 8                     |                         | p23.1     | rs17778223 | 10729692              | A        | 0.177              | 0.223                 | 0.728  | 0.0104   | XKR6            |                          | ND                    |
| 8                     |                         | p23.1     | rs11989027 | 10731271              | A        | 0.409              | 0.461                 | 0.824  | 0.0499   | XKR6            |                          | ND                    |
| 8                     |                         | p23.1     | rs2163379  | 10732050              | T        | 0.424              | 0.376                 | 1.283  | 0.0117   | XKR6            |                          | 6                     |
| 8                     |                         | p23.1     | rs10090444 | 10745469              | G        | 0.520              | 0.444                 | 1.391  | 6.71E-04 | XKR6            |                          | 6                     |
| 8                     |                         | p23.1     | rs2898249  | 10745586              | T        | 0.316              | 0.269                 | 1.267  | 0.0238   | XKR6            |                          | ND                    |
| 8                     |                         | p23.1     | rs6985109  | 10761585              | G        | 0.522              | 0.442                 | 1.393  | 6.27E-04 | XKR6            | intron                   | 1f                    |
| 8                     |                         | p23.1     | rs4326350  | 10763655              | C        | 0.456              | 0.523                 | 0.764  | 5.25E-03 | XKR6            | intron                   | 1f                    |
| 8                     |                         | p23.1     | rs4310166  | 10763736              | G        | 0.334              | 0.417                 | 0.709  | 5.24E-04 | XKR6            | intron                   | 6                     |
| 8                     |                         | p23.1     | rs6987083  | 10764045              | C        | 0.150              | 0.196                 | 0.752  | 0.0307   | XKR6            | intron                   | 5                     |
| 8                     |                         | p23.1     | rs4240671  | 10767748              | A        | 0.455              | 0.519                 | 0.773  | 7.38E-03 | XKR6            | intron                   | 1f                    |
| 8                     | p23.1                   | rs6601537 | 10775412   | C                     | 0.174    | 0.229              | 0.75                  | 0.0188 | XKR6     | intron          | 1f                       |                       |
| 8                     | p23.1                   | rs6601538 | 10775454   | G                     | 0.182    | 0.234              | 0.75                  | 0.0216 | XKR6     | intron          | 5                        |                       |
| 8                     | p23.1                   | rs7016385 | 10779472   | G                     | 0.495    | 0.440              | 1.253                 | 0.0224 | XKR6     | intron          | 1f                       |                       |

| Locus / Gene(s) | Chr | Band  | SNP*              | Position in bp (hg19) | Allele | Freq          | Freq             | OR    | P**      | Nearest Gene*** | Location in the Gene**** | RegulomeDB score***** |
|-----------------|-----|-------|-------------------|-----------------------|--------|---------------|------------------|-------|----------|-----------------|--------------------------|-----------------------|
|                 |     |       |                   |                       |        | Cases (n=661) | Controls (n=487) |       |          |                 |                          |                       |
|                 | 8   | p23.1 | rs7821438         | 10783223              | C      | 0.173         | 0.208            | 0.753 | 0.0264   | XKR6            | intron                   | 5                     |
|                 | 8   | p23.1 | <b>rs11250092</b> | 10786543              | G      | 0.501         | 0.444            | 1.255 | 0.0207   | XKR6            | intron                   | <b>1f</b>             |
|                 | 8   | p23.1 | <b>rs6984496</b>  | 10796093              | G      | 0.513         | 0.445            | 1.335 | 3.53E-03 | XKR6            | intron                   | <b>1f</b>             |
|                 | 8   | p23.1 | <b>rs11250093</b> | 10798828              | T      | 0.490         | 0.428            | 1.313 | 5.92E-03 | XKR6            | intron                   | <b>1f</b>             |
|                 | 8   | p23.1 | rs7821914         | 10805015              | G      | 0.393         | 0.461            | 0.727 | 1.31E-03 | XKR6            | intron                   | <b>1f</b>             |
|                 | 8   | p23.1 | <b>rs11250099</b> | 10818657              | T      | 0.515         | 0.449            | 1.327 | 3.58E-03 | XKR6            | intron                   | <b>1f</b>             |
|                 | 8   | p23.1 | rs7825690         | 10858257              | T      | 0.376         | 0.427            | 0.803 | 0.0279   | XKR6            | intron                   | 6                     |
|                 | 8   | p23.1 | rs7846545         | 10876603              | G      | 0.235         | 0.259            | 0.792 | 0.0444   | XKR6            | intron                   | 5                     |
|                 | 8   | p23.1 | rs11250110        | 10878357              | G      | 0.160         | 0.194            | 0.762 | 0.0397   | XKR6            | intron                   | 5                     |
|                 | 8   | p23.1 | rs6601550         | 10888425              | A      | 0.235         | 0.288            | 0.768 | 0.0168   | XKR6            | intron                   | 6                     |
|                 | 8   | p23.1 | rs11996027        | 10891395              | G      | 0.239         | 0.284            | 0.79  | 0.0332   | XKR6            | intron                   | ND                    |
|                 | 8   | p23.1 | rs2898254         | 10892530              | T      | 0.231         | 0.285            | 0.772 | 0.0199   | XKR6            | intron                   | ND                    |
|                 | 8   | p23.1 | rs17722940        | 10898459              | G      | 0.232         | 0.285            | 0.749 | 9.13E-03 | XKR6            | intron                   | ND                    |
|                 | 8   | p23.1 | rs4349949         | 10900621              | A      | 0.235         | 0.282            | 0.785 | 0.0279   | XKR6            | intron                   | 6                     |
|                 | 8   | p23.1 | rs6983680         | 10901931              | A      | 0.235         | 0.283            | 0.762 | 0.0161   | XKR6            | intron                   | 5                     |
|                 | 8   | p23.1 | rs4841486         | 10911489              | A      | 0.306         | 0.363            | 0.777 | 0.0151   | XKR6            | intron                   | 5                     |
|                 | 8   | p23.1 | rs13248300        | 10926675              | G      | 0.297         | 0.361            | 0.752 | 5.69E-03 | XKR6            | intron                   | 6                     |
|                 | 8   | p23.1 | rs6980856         | 10938260              | G      | 0.529         | 0.439            | 1.415 | 3.60E-04 | XKR6            | intron                   | <b>1f</b>             |
|                 | 8   | p23.1 | rs11991118        | 10939273              | A      | 0.439         | 0.525            | 0.712 | 4.46E-04 | XKR6            | intron                   | <b>1f</b>             |
|                 | 8   | p23.1 | rs2409690         | 10940039              | G      | 0.042         | 0.032            | 1.632 | 0.0497   | XKR6            | intron                   | 5                     |
|                 | 8   | p23.1 | rs17779791        | 10940241              | G      | 0.298         | 0.354            | 0.813 | 0.0449   | XKR6            | intron                   | 5                     |
|                 | 8   | p23.1 | rs17152841        | 10942929              | C      | 0.251         | 0.317            | 0.753 | 7.80E-03 | XKR6            | intron                   | 5                     |
|                 | 8   | p23.1 | rs2409691         | 10943276              | T      | 0.423         | 0.526            | 0.659 | 2.78E-05 | XKR6            | intron                   | <b>1f</b>             |
|                 | 8   | p23.1 | rs9657544         | 10944616              | C      | 0.285         | 0.350            | 0.762 | 9.91E-03 | XKR6            | intron                   | ND                    |
|                 | 8   | p23.1 | rs10087767        | 10952613              | T      | 0.247         | 0.312            | 0.754 | 8.18E-03 | XKR6            | intron                   | ND                    |
|                 | 8   | p23.1 | rs10108618        | 10953092              | G      | 0.461         | 0.553            | 0.679 | 8.58E-05 | XKR6            | intron                   | <b>1f</b>             |
|                 | 8   | p23.1 | rs17724226        | 10968926              | T      | 0.390         | 0.473            | 0.721 | 1.23E-03 | XKR6            | intron                   | 6                     |
|                 | 8   | p23.1 | rs7460507         | 10969075              | T      | 0.402         | 0.483            | 0.729 | 1.43E-03 | XKR6            | intron                   | 6                     |
|                 | 8   | p23.1 | rs4841498         | 10985432              | C      | 0.526         | 0.449            | 1.328 | 3.80E-03 | XKR6            | intron                   | 6                     |
|                 | 8   | p23.1 | rs2409712         | 10986837              | C      | 0.392         | 0.454            | 0.781 | 0.0130   | XKR6            | intron                   | <b>1f</b>             |
|                 | 8   | p23.1 | rs10503416        | 10987553              | C      | 0.380         | 0.451            | 0.745 | 3.69E-03 | XKR6            | intron                   | <b>1b</b>             |
|                 | 8   | p23.1 | rs3021495         | 10994743              | G      | 0.333         | 0.401            | 0.791 | 0.0270   | XKR6            | intron                   | 4                     |
|                 | 8   | p23.1 | rs17725480        | 11009317              | T      | 0.264         | 0.316            | 0.784 | 0.0255   | XKR6            | intron                   | ND                    |
|                 | 8   | p23.1 | rs17725534        | 11009669              | G      | 0.256         | 0.319            | 0.741 | 6.62E-03 | XKR6            | intron                   | 5                     |
|                 | 8   | p23.1 | rs2409714         | 11010118              | G      | 0.409         | 0.472            | 0.762 | 6.05E-03 | XKR6            | intron                   | 6                     |
|                 | 8   | p23.1 | rs17782554        | 11022106              | G      | 0.342         | 0.417            | 0.75  | 4.29E-03 | XKR6            | intron                   | 6                     |
|                 | 8   | p23.1 | rs17726209        | 11022185              | C      | 0.342         | 0.419            | 0.739 | 2.85E-03 | XKR6            | intron                   | 6                     |
|                 | 8   | p23.1 | rs9329238         | 11033737              | T      | 0.331         | 0.406            | 0.72  | 1.47E-03 | XKR6            | intron                   | 6                     |
|                 | 8   | p23.1 | rs7813802         | 11033976              | T      | 0.528         | 0.452            | 1.345 | 3.62E-03 | XKR6            | intron                   | 6                     |
|                 | 8   | p23.1 | rs4451268         | 11034859              | G      | 0.334         | 0.408            | 0.728 | 2.05E-03 | XKR6            | intron                   | <b>1d</b>             |
|                 | 8   | p23.1 | rs11777887        | 11036799              | C      | 0.330         | 0.406            | 0.715 | 1.21E-03 | XKR6            | intron                   | ND                    |
|                 | 8   | p23.1 | rs11777918        | 11036919              | A      | 0.335         | 0.411            | 0.737 | 3.18E-03 | XKR6            | intron                   | 5                     |
|                 | 8   | p23.1 | rs11250119        | 11037034              | T      | 0.428         | 0.518            | 0.72  | 6.62E-04 | XKR6            | intron                   | <b>1f</b>             |
|                 | 8   | p23.1 | rs2409720         | 11037903              | C      | 0.330         | 0.413            | 0.715 | 9.08E-04 | XKR6            | intron                   | <b>1f</b>             |
|                 | 8   | p23.1 | rs7819412         | 11045161              | G      | 0.525         | 0.442            | 1.393 | 7.40E-04 | XKR6            | intron                   | 6                     |
|                 | 8   | p23.1 | rs4841507         | 11046394              | G      | 0.382         | 0.453            | 0.723 | 1.34E-03 | XKR6            | intron                   | 6                     |
|                 | 8   | p23.1 | rs11989369        | 11055385              | A      | 0.326         | 0.404            | 0.716 | 1.23E-03 | XKR6            | intron                   | 6                     |
|                 | 8   | p23.1 | rs11783045        | 11056175              | G      | 0.330         | 0.411            | 0.7   | 5.29E-04 | XKR6            | intron                   | <b>1f</b>             |
|                 | 8   | p23.1 | rs7010590         | 11062882              | C      | 0.464         | 0.544            | 0.721 | 8.55E-04 | XKR6            |                          | <b>1f</b>             |
|                 | 8   | p23.1 | rs4412337         | 11072020              | C      | 0.325         | 0.407            | 0.706 | 6.75E-04 | XKR6            |                          | 6                     |
|                 | 8   | p23.1 | rs6601569         | 11073578              | C      | 0.483         | 0.424            | 1.306 | 6.05E-03 | XKR6            |                          | 6                     |
|                 | 8   | p23.1 | rs2409745         | 11076635              | T      | 0.518         | 0.435            | 1.423 | 3.75E-04 | XKR6            |                          | 6                     |
|                 | 8   | p23.1 | rs2736313         | 11086942              | C      | 0.463         | 0.536            | 0.74  | 1.89E-03 | XKR6            |                          | <b>1f</b>             |
|                 | 8   | p23.1 | rs920047          | 11087475              | T      | 0.445         | 0.520            | 0.744 | 2.32E-03 | XKR6            |                          | 6                     |
|                 | 8   | p23.1 | rs10092549        | 11089079              | C      | 0.433         | 0.390            | 1.268 | 0.0160   | XKR6            |                          | 6                     |
|                 | 8   | p23.1 | rs2572406         | 11092252              | G      | 0.525         | 0.461            | 1.33  | 3.57E-03 | XKR6            |                          | 6                     |
|                 | 8   | p23.1 | rs6601572         | 11093337              | C      | 0.463         | 0.407            | 1.376 | 1.16E-03 | XKR6            |                          | 6                     |
|                 | 8   | p23.1 | rs6601575         | 11097804              | C      | 0.509         | 0.447            | 1.379 | 1.24E-03 | XKR6            |                          | 6                     |
|                 | 8   | p23.1 | rs2572437         | 11098441              | T      | 0.301         | 0.385            | 0.704 | 6.44E-04 | XKR6            |                          | 6                     |
|                 | 8   | p23.1 | rs2572433         | 11101041              | C      | 0.317         | 0.392            | 0.726 | 1.72E-03 | MTMR9           |                          | <b>1f</b>             |
|                 | 8   | p23.1 | rs2572432         | 11101723              | G      | 0.304         | 0.385            | 0.708 | 7.45E-04 | MTMR9           |                          | <b>1f</b>             |
|                 | 8   | p23.1 | rs6601577         | 11102682              | G      | 0.461         | 0.399            | 1.395 | 9.56E-04 | MTMR9           |                          | 6                     |
|                 | 8   | p23.1 | rs958648          | 11103895              | A      | 0.486         | 0.406            | 1.459 | 1.56E-04 | MTMR9           |                          | 6                     |
|                 | 8   | p23.1 | rs7824557         | 11104111              | C      | 0.433         | 0.366            | 1.471 | 1.41E-04 | MTMR9           |                          | 6                     |
|                 | 8   | p23.1 | rs2572431         | 11105077              | C      | 0.475         | 0.399            | 1.452 | 1.77E-04 | MTMR9           |                          | 6                     |
|                 | 8   | p23.1 | rs2572430         | 11105304              | T      | 0.487         | 0.409            | 1.477 | 1.63E-04 | MTMR9           |                          | 6                     |
|                 | 8   | p23.1 | rs2572417         | 11111462              | A      | 0.502         | 0.420            | 1.425 | 3.10E-04 | MTMR9           |                          | 6                     |
|                 | 8   | p23.1 | rs2736374         | 11113828              | G      | 0.356         | 0.444            | 0.697 | 2.49E-04 | MTMR9           |                          | 6                     |
|                 | 8   | p23.1 | rs10503418        | 11118983              | C      | 0.453         | 0.397            | 1.394 | 7.89E-04 | MTMR9           |                          | <b>1f</b>             |
|                 | 8   | p23.1 | rs2251301         | 11119037              | A      | 0.146         | 0.182            | 0.766 | 0.0473   | MTMR9           |                          | 5                     |
|                 | 8   | p23.1 | rs11997943        | 11119981              | G      | 0.210         | 0.260            | 0.754 | 0.0136   | MTMR9           |                          | 5                     |
|                 | 8   | p23.1 | rs2099456         | 11127001              | C      | 0.452         | 0.397            | 1.388 | 9.16E-04 | MTMR9           |                          | <b>1f</b>             |
|                 | 8   | p23.1 | rs2736381         | 11132766              | A      | 0.442         | 0.382            | 1.377 | 1.67E-03 | MTMR9           |                          | 6                     |
|                 | 8   | p23.1 | rs3808518         | 11143272              | A      | 0.453         | 0.391            | 1.437 | 2.67E-04 | MTMR9           | intron                   | <b>1f</b>             |
|                 | 8   | p23.1 | rs2117616         | 11145911              | G      | 0.409         | 0.473            | 0.781 | 0.0140   | MTMR9           | intron                   | <b>1f</b>             |

| Locus / Gene(s) | Chr | Band  | SNP*             | Position in bp (hg19) | Allele | Freq Cases (n=661) | Freq Controls (n=487) | OR    | P**      | Nearest Gene*** | Location in the Gene**** | RegulomeDB score***** |
|-----------------|-----|-------|------------------|-----------------------|--------|--------------------|-----------------------|-------|----------|-----------------|--------------------------|-----------------------|
|                 | 8   | p23.1 | rs4841519        | 11146228              | A      | 0.402              | 0.476                 | 0.748 | 2.75E-03 | MTMR9           | intron                   | 1f                    |
|                 | 8   | p23.1 | rs2572426        | 11147123              | C      | 0.398              | 0.471                 | 0.743 | 2.39E-03 | MTMR9           | intron                   | 1d                    |
|                 | 8   | p23.1 | rs3808515        | 11156041              | C      | 0.401              | 0.474                 | 0.754 | 3.31E-03 | MTMR9           | intron                   | 6                     |
|                 | 8   | p23.1 | rs4410870        | 11156120              | G      | 0.354              | 0.436                 | 0.742 | 2.09E-03 | MTMR9           | intron                   | 6                     |
|                 | 8   | p23.1 | rs3808513        | 11157460              | G      | 0.452              | 0.390                 | 1.432 | 3.36E-04 | MTMR9           | intron                   | 6                     |
|                 | 8   | p23.1 | rs1545073        | 11167700              | C      | 0.402              | 0.474                 | 0.756 | 3.99E-03 | MTMR9           | intron                   | 6                     |
|                 | 8   | p23.1 | rs6985146        | 11170721              | C      | 0.449              | 0.387                 | 1.44  | 2.92E-04 | MTMR9           | intron                   | 6                     |
|                 | 8   | p23.1 | rs11784572       | 11174484              | G      | 0.359              | 0.407                 | 0.733 | 2.29E-03 | MTMR9           | intron                   | 6                     |
|                 | 8   | p23.1 | rs6995404        | 11182148              | G      | 0.519              | 0.470                 | 1.379 | 1.16E-03 | MTMR9           | exon-3'UTR               | 1f                    |
|                 | 8   | p23.1 | rs12681987       | 11189488              | A      | 0.444              | 0.498                 | 0.733 | 1.76E-03 | SLC35G5         | exon-synonymous          | 1f                    |
|                 | 8   | p23.1 | rs10098322       | 11196295              | G      | 0.519              | 0.470                 | 1.352 | 2.31E-03 | TDH             |                          | 6                     |
|                 | 8   | p23.1 | rs11250130       | 11214455              | T      | 0.425              | 0.484                 | 0.741 | 2.39E-03 | TDH             | intron                   | 1f                    |
|                 | 8   | p23.1 | rs11781637       | 11214972              | T      | 0.424              | 0.484                 | 0.74  | 2.29E-03 | TDH             | intron                   | 1f                    |
|                 | 8   | p23.1 | rs2249804        | 11215617              | C      | 0.406              | 0.477                 | 0.72  | 9.34E-04 | TDH             | intron                   | 6                     |
|                 | 8   | p23.1 | rs2572371        | 11223793              | G      | 0.475              | 0.515                 | 0.803 | 0.0238   | TDH             | intron                   | 6                     |
|                 | 8   | p23.1 | rs2736282        | 11225480              | C      | 0.477              | 0.523                 | 0.779 | 0.0102   | TDH             | intron                   | 1f                    |
|                 | 8   | p23.1 | rs2736283        | 11225910              | G      | 0.475              | 0.521                 | 0.78  | 0.0108   | TDH             | exon                     | 1f                    |
|                 | 8   | p23.1 | rs2736286        | 11227104              | G      | 0.479              | 0.522                 | 0.804 | 0.0263   | C8orf12         | intron                   | 5                     |
|                 | 8   | p23.1 | rs2572452        | 11228254              | T      | 0.474              | 0.522                 | 0.778 | 0.0105   | C8orf12         | intron                   | 6                     |
|                 | 8   | p23.1 | rs13260727       | 11232860              | A      | 0.407              | 0.464                 | 0.737 | 2.28E-03 | C8orf12         | intron                   | 6                     |
|                 | 8   | p23.1 | rs2736292        | 11234500              | A      | 0.411              | 0.472                 | 0.735 | 1.93E-03 | C8orf12         | intron                   | 1f                    |
|                 | 8   | p23.1 | rs2736295        | 11234780              | C      | 0.399              | 0.461                 | 0.742 | 3.96E-03 | C8orf12         | intron                   | 6                     |
|                 | 8   | p23.1 | rs2572449        | 11239137              | A      | 0.396              | 0.457                 | 0.739 | 2.46E-03 | C8orf12         | intron                   | 1f                    |
|                 | 8   | p23.1 | rs2736306        | 11239762              | A      | 0.414              | 0.473                 | 0.752 | 4.48E-03 | C8orf12         | intron                   | 1f                    |
|                 | 8   | p23.1 | rs2409756        | 11242025              | C      | 0.390              | 0.454                 | 0.74  | 2.79E-03 | C8orf12         | intron                   | 6                     |
|                 | 8   | p23.1 | rs4841525        | 11249261              | A      | 0.325              | 0.383                 | 0.738 | 3.25E-03 | C8orf12         | intron                   | 5                     |
|                 | 8   | p23.1 | rs11250131       | 11251175              | T      | 0.464              | 0.503                 | 0.805 | 0.0305   | C8orf12         | intron                   | 6                     |
|                 | 8   | p23.1 | rs2736311        | 11252170              | C      | 0.495              | 0.467                 | 1.235 | 0.0361   | C8orf12         | intron                   | 1f                    |
|                 | 8   | p23.1 | rs7003840        | 11266131              | T      | 0.443              | 0.396                 | 1.267 | 0.0191   | C8orf12         | intron                   | 6                     |
|                 | 8   | p23.1 | rs2409764        | 11281273              | C      | 0.403              | 0.483                 | 0.73  | 2.05E-03 | C8orf12/FAM167A | intron/3'UTR             | 1f                    |
|                 | 8   | p23.1 | rs17153220       | 11285025              | C      | 0.035              | 0.021                 | 1.869 | 0.0393   | C8orf12/FAM167A | intron/intron            | 4                     |
|                 | 8   | p23.1 | rs4841529        | 11285581              | G      | 0.422              | 0.488                 | 0.734 | 2.33E-03 | C8orf12/FAM167A | intron/intron            | 3a                    |
|                 | 8   | p23.1 | rs10503423       | 11287081              | G      | 0.413              | 0.343                 | 1.492 | 1.30E-04 | C8orf12/FAM167A | intron/intron            | 1f                    |
|                 | 8   | p23.1 | rs6998387        | 11293458              | T      | 0.395              | 0.312                 | 1.553 | 1.87E-05 | C8orf12/FAM167A | intron/intron            | 1f                    |
|                 | 8   | p23.1 | rs2001462        | 11294810              | A      | 0.165              | 0.251                 | 0.697 | 2.20E-03 | C8orf12/FAM167A | intron/intron            | ND                    |
|                 | 8   | p23.1 | rs7001675        | 11296600              | G      | 0.490              | 0.437                 | 1.311 | 5.03E-03 | FAM167A         | intron                   | 1f                    |
|                 | 8   | p23.1 | rs11779875       | 11302445              | C      | 0.398              | 0.320                 | 1.534 | 2.68E-05 | FAM167A         | intron                   | 1f                    |
|                 | 8   | p23.1 | rs9792375        | 11302481              | C      | 0.461              | 0.407                 | 1.329 | 2.99E-03 | FAM167A         | intron                   | 1f                    |
|                 | 8   | p23.1 | rs2409772        | 11306516              | T      | 0.481              | 0.418                 | 1.325 | 3.64E-03 | FAM167A         | intron                   | 1f                    |
|                 | 8   | p23.1 | rs2409773        | 11306615              | G      | 0.401              | 0.310                 | 1.581 | 9.53E-06 | FAM167A         | intron                   | 1b                    |
|                 | 8   | p23.1 | rs2409775        | 11306805              | G      | 0.486              | 0.418                 | 1.374 | 9.24E-04 | FAM167A         | intron                   | 1f                    |
|                 | 8   | p23.1 | rs9792175        | 11307118              | A      | 0.466              | 0.404                 | 1.361 | 1.79E-03 | FAM167A         | intron                   | 5                     |
|                 | 8   | p23.1 | rs4841537        | 11307572              | C      | 0.489              | 0.419                 | 1.388 | 6.25E-04 | FAM167A         | intron                   | 1f                    |
|                 | 8   | p23.1 | rs13439415       | 11310012              | T      | 0.362              | 0.430                 | 0.764 | 6.04E-03 | FAM167A         | intron                   | 1f                    |
|                 | 8   | p23.1 | rs9644687        | 11323025              | A      | 0.332              | 0.270                 | 1.336 | 6.35E-03 | FAM167A         | intron                   | 1d                    |
|                 | 8   | p23.1 | rs11250138       | 11323312              | C      | 0.340              | 0.272                 | 1.339 | 5.60E-03 | FAM167A         | intron                   | 1f                    |
|                 | 8   | p23.1 | rs11250139       | 11331046              | A      | 0.411              | 0.444                 | 0.806 | 0.0289   | FAM167A         |                          | 5                     |
|                 | 8   | p23.1 | rs12680762       | 11332026              | A      | 0.322              | 0.243                 | 1.536 | 6.69E-05 | FAM167A         |                          | 4                     |
|                 | 8   | p23.1 | rs2254891        | 11341129              | C      | 0.296              | 0.341                 | 0.801 | 0.0427   | BLK             |                          | 1f                    |
|                 | 8   | p23.1 | rs978803         | 11343475              | T      | 0.524              | 0.455                 | 1.316 | 4.09E-03 | BLK             |                          | 6                     |
|                 | 8   | p23.1 | <b>rs2736340</b> | 11343973              | T      | 0.305              | 0.225                 | 1.575 | 5.42E-05 | BLK             |                          | 1f                    |
|                 | 8   | p23.1 | rs2736342        | 11347289              | A      | 0.511              | 0.442                 | 1.28  | 0.0107   | BLK             |                          | 1f                    |
|                 | 8   | p23.1 | rs4840567        | 11347625              | A      | 0.526              | 0.453                 | 1.319 | 4.06E-03 | BLK             |                          | 1f                    |
|                 | 8   | p23.1 | <b>rs2618476</b> | 11352541              | G      | 0.328              | 0.237                 | 1.625 | 2.39E-05 | BLK             | intron                   | 1d                    |
|                 | 8   | p23.1 | <b>rs998683</b>  | 11353000              | A      | 0.320              | 0.233                 | 1.549 | 7.66E-05 | BLK             | intron                   | 1f                    |
|                 | 8   | p23.1 | rs1478890        | 11355602              | C      | 0.530              | 0.451                 | 1.356 | 1.93E-03 | BLK             | intron                   | 1f                    |
|                 | 8   | p23.1 | rs2618443        | 11384556              | A      | 0.503              | 0.421                 | 1.411 | 3.40E-04 | BLK             | intron                   | 6                     |
|                 | 8   | p23.1 | <b>rs9329246</b> | 11392880              | G      | 0.393              | 0.317                 | 1.462 | 3.42E-04 | BLK             | intron                   | 6                     |
|                 | 8   | p23.1 | rs17153419       | 11394233              | C      | 0.339              | 0.267                 | 1.467 | 3.25E-04 | BLK             | intron                   | 1f                    |
|                 | 8   | p23.1 | <b>rs1478897</b> | 11395232              | T      | 0.424              | 0.337                 | 1.56  | 8.14E-06 | BLK             | intron                   | 1d                    |
|                 | 8   | p23.1 | rs2409784        | 11396856              | T      | 0.457              | 0.539                 | 0.698 | 2.10E-04 | BLK             | intron                   | 1d                    |
|                 | 8   | p23.1 | rs4841554        | 11408935              | C      | 0.320              | 0.361                 | 0.811 | 0.0446   | BLK             | intron                   | 5                     |
|                 | 8   | p23.1 | rs7007439        | 11415794              | A      | 0.447              | 0.365                 | 1.44  | 1.49E-04 | BLK             | intron                   | 1f                    |
|                 | 8   | p23.1 | rs6983727        | 11415812              | A      | 0.418              | 0.490                 | 0.75  | 2.39E-03 | BLK             | intron                   | 1f                    |
|                 | 8   | p23.1 | rs7011778        | 11416171              | A      | 0.444              | 0.362                 | 1.434 | 1.68E-04 | BLK             | intron                   | 1d                    |
|                 | 8   | p23.1 | rs1382563        | 11426790              | C      | 0.421              | 0.491                 | 0.763 | 4.29E-03 | BLK             |                          | 1f                    |
|                 | 8   | p23.1 | rs12547947       | 11427341              | C      | 0.407              | 0.344                 | 1.327 | 3.55E-03 | BLK             |                          | 1f                    |
|                 | 8   | p23.1 | rs10107563       | 11427492              | A      | 0.040              | 0.024                 | 1.821 | 0.0391   | BLK             |                          | 5                     |
|                 | 8   | p23.1 | rs7831039        | 11427637              | T      | 0.420              | 0.489                 | 0.766 | 4.90E-03 | BLK             |                          | 1f                    |
|                 | 8   | p23.1 | rs12679960       | 11430990              | T      | 0.368              | 0.293                 | 1.456 | 3.91E-04 | LINC00208       |                          | 1d                    |
|                 | 8   | p23.1 | rs2409800        | 11439013              | G      | 0.363              | 0.305                 | 1.293 | 0.0132   | LINC00208       |                          | 6                     |
|                 | 8   | p23.1 | rs11250149       | 11439961              | G      | 0.359              | 0.292                 | 1.301 | 9.31E-03 | LINC00208       |                          | 6                     |
|                 | 8   | p23.1 | rs12677146       | 11450737              | C      | 0.390              | 0.321                 | 1.342 | 3.14E-03 | LINC00208       |                          | 1f                    |
|                 | 8   | p23.1 | rs11250152       | 11454200              | A      | 0.434              | 0.345                 | 1.414 | 5.31E-04 | LINC00208       |                          | 1f                    |
|                 | 8   | p23.1 | rs17807624       | 11463015              | A      | 0.384              | 0.297                 | 1.454 | 1.89E-04 | LINC00208       |                          | 6                     |

| Locus / Gene(s)          | Chr              | Band        | SNP*              | Position in bp (hg19) | Allele     | Freq Cases (n=661) | Freq Controls (n=487) | OR    | P**      | Nearest Gene***  | Location in the Gene**** | RegulomeDB score***** |           |           |
|--------------------------|------------------|-------------|-------------------|-----------------------|------------|--------------------|-----------------------|-------|----------|------------------|--------------------------|-----------------------|-----------|-----------|
| <b>WDFY4</b>             | 8                | p23.1       | rs4840573         | 11463230              | A          | 0.339              | 0.408                 | 0.775 | 9.99E-03 | <i>LINC00208</i> |                          | <b>1f</b>             |           |           |
|                          | 8                | p23.1       | rs13278965        | 11466745              | A          | 0.389              | 0.457                 | 0.799 | 0.0236   | <i>LINC00208</i> |                          | 6                     |           |           |
|                          | 10               | q11.23      | rs4838639         | 49901961              | T          | 0.040              | 0.020                 | 2.325 | 5.07E-03 | <i>WDFY4</i>     | intron                   | 5                     |           |           |
|                          | 10               | q11.23      | rs12245739        | 49906091              | T          | 0.040              | 0.019                 | 2.136 | 0.0145   | <i>WDFY4</i>     | intron                   | 5                     |           |           |
|                          | 10               | q11.23      | rs11101436        | 49919567              | T          | 0.039              | 0.018                 | 2.132 | 0.0146   | <i>WDFY4</i>     | intron                   | 6                     |           |           |
|                          | 10               | q11.23      | rs12267792        | 49921749              | T          | 0.040              | 0.018                 | 2.132 | 0.0146   | <i>WDFY4</i>     | intron                   | 5                     |           |           |
|                          | 10               | q11.23      | rs4838646         | 49945594              | G          | 0.473              | 0.521                 | 0.821 | 0.0415   | <i>WDFY4</i>     | intron                   | 6                     |           |           |
|                          | 10               | q11.23      | rs12768835        | 49976969              | A          | 0.409              | 0.453                 | 0.811 | 0.0316   | <i>WDFY4</i>     | intron                   | 5                     |           |           |
|                          | 10               | q11.23      | <b>rs2663038</b>  | 50099468              | G          | 0.436              | 0.486                 | 0.786 | 0.0185   | <i>WDFY4</i>     | intron                   | <b>2b</b>             |           |           |
|                          | 10               | q11.23      | rs17836512        | 50100434              | C          | 0.052              | 0.033                 | 1.698 | 0.0358   | <i>WDFY4</i>     | intron                   | 6                     |           |           |
| <b>ARID5B</b>            | 10               | q11.23      | rs17011569        | 50178485              | C          | 0.091              | 0.065                 | 1.451 | 0.0388   | <i>WDFY4</i>     | intron                   | 5                     |           |           |
|                          | 10               | q11.23      | rs17009410        | 50179201              | A          | 0.048              | 0.026                 | 1.903 | 0.0149   | <i>WDFY4</i>     | intron                   | 6                     |           |           |
|                          | 10               | q21.2       | rs1530439         | 63645959              | T          | 0.285              | 0.322                 | 0.792 | 0.0351   | <i>ARID5B</i>    |                          | ND                    |           |           |
|                          | 10               | q21.2       | rs9415636         | 63826186              | A          | 0.072              | 0.095                 | 0.681 | 0.0335   | <i>ARID5B</i>    | intron                   | 5                     |           |           |
|                          | 10               | q21.2       | rs1122157         | 63861600              | A          | 0.305              | 0.267                 | 1.275 | 0.0260   | <i>ARID5B</i>    |                          | 5                     |           |           |
|                          | <b>PDHX/CD44</b> | 11          | p13               | rs16926365            | 34915650   | T                  | 0.031                 | 0.042 | 0.515    | 0.0183           | <i>APIP</i>              | intron                | 6         |           |
|                          |                  | 11          | p13               | rs17362114            | 34951533   | G                  | 0.030                 | 0.042 | 0.513    | 0.0180           | <i>PDHX</i>              | intron                | <b>2a</b> |           |
|                          |                  | 11          | p13               | rs41512444            | 34959234   | G                  | 0.030                 | 0.042 | 0.513    | 0.0180           | <i>PDHX</i>              | intron                | ND        |           |
|                          |                  | 11          | p13               | rs7115217             | 34985327   | C                  | 0.035                 | 0.042 | 0.552    | 0.0331           | <i>PDHX</i>              | intron                | ND        |           |
|                          |                  | 11          | p13               | rs11032960            | 34998014   | A                  | 0.035                 | 0.044 | 0.54     | 0.0234           | <i>PDHX</i>              | intron                | ND        |           |
| 11                       |                  | p13         | rs11032963        | 34999861              | T          | 0.032              | 0.042                 | 0.565 | 0.0378   | <i>PDHX</i>      | intron                   | 5                     |           |           |
| 11                       |                  | p13         | rs17436343        | 35019789              | A          | 0.031              | 0.049                 | 0.459 | 5.38E-03 | <i>PDHX</i>      |                          | 4                     |           |           |
| 11                       |                  | p13         | rs16926673        | 35022765              | T          | 0.033              | 0.042                 | 0.534 | 0.0247   | <i>PDHX</i>      |                          | 5                     |           |           |
| 11                       |                  | p13         | rs353647          | 35191445              | C          | 0.474              | 0.430                 | 1.229 | 0.0318   | <i>CD44</i>      | intron                   | 4                     |           |           |
| <b>ETS1</b>              |                  | 11          | q24.3             | rs12805120            | 128365685  | A                  | 0.283                 | 0.253 | 1.286    | 0.0212           | <i>ETS1</i>              | intron                | 5         |           |
|                          |                  | 11          | q24.3             | rs7929911             | 128369597  | T                  | 0.280                 | 0.251 | 1.277    | 0.0264           | <i>ETS1</i>              | intron                | 5         |           |
|                          | 11               | q24.3       | rs7941606         | 128372168             | A          | 0.283              | 0.253                 | 1.282 | 0.0228   | <i>ETS1</i>      | intron                   | 4                     |           |           |
| <b>CREBL2/CDKN1B</b>     | 12               | p13.2       | rs1014448         | 12746585              | G          | 0.072              | 0.081                 | 0.649 | 0.0221   | <i>CREBL2</i>    |                          | ND                    |           |           |
|                          | 12               | p13.2       | rs10492241        | 12750509              | C          | 0.425              | 0.456                 | 0.821 | 0.0411   | <i>CREBL2</i>    |                          | ND                    |           |           |
|                          | 12               | p13.2       | rs10845586        | 12751662              | G          | 0.431              | 0.459                 | 0.817 | 0.0357   | <i>CREBL2</i>    |                          | 6                     |           |           |
|                          | 12               | p13.2       | <b>rs12822507</b> | 12773521              | C          | 0.304              | 0.343                 | 0.804 | 0.0360   | <i>CREBL2</i>    | intron                   | 5                     |           |           |
|                          | 12               | p13.1       | rs10845601        | 12820134              | A          | 0.349              | 0.395                 | 0.821 | 0.0496   | <i>GPR19</i>     |                          | ND                    |           |           |
|                          | 12               | p13.1       | rs2024385         | 12888438              | A          | 0.397              | 0.436                 | 0.812 | 0.0318   | <i>APOLD1</i>    | intron                   | 5                     |           |           |
| <b>SLC15A4</b>           | 12               | q24.33      | rs10847705        | 129343928             | A          | 0.151              | 0.104                 | 1.411 | 0.0189   | <i>GLT1D1</i>    | intron                   | 5                     |           |           |
| <b>ELF1</b>              | 13               | q14.11      | rs7799            | 41533052              | A          | 0.309              | 0.347                 | 0.791 | 0.0280   | <i>ELF1</i>      | exon-missense            | 4                     |           |           |
|                          | 13               | q14.11      | rs9594471         | 41562786              | G          | 0.154              | 0.208                 | 0.767 | 0.0347   | <i>ELF1</i>      | intron                   | ND                    |           |           |
|                          | 13               | q14.11      | rs9566655         | 41578109              | A          | 0.155              | 0.209                 | 0.771 | 0.0364   | <i>ELF1</i>      | intron                   | ND                    |           |           |
|                          | 13               | q14.11      | rs11617732        | 41580259              | C          | 0.433              | 0.390                 | 1.216 | 0.0492   | <i>ELF1</i>      | intron                   | 4                     |           |           |
|                          | 13               | q14.11      | rs9566656         | 41581930              | A          | 0.168              | 0.225                 | 0.79  | 0.0491   | <i>ELF1</i>      | intron                   | 5                     |           |           |
|                          | 13               | q14.11      | rs2772181         | 41632244              | C          | 0.159              | 0.212                 | 0.78  | 0.0419   | <i>WBP4</i>      |                          | ND                    |           |           |
|                          | <b>PRKCB</b>     | 16          | p11.2             | rs2214437             | 24275388   | A                  | 0.446                 | 0.480 | 0.8      | 0.0228           | <i>CACNG3</i>            | intron                | 6         |           |
| <b>ITGAM/ITGAX/ITGAD</b> |                  | 16          | p11.2             | rs4889640             | 31264267   | C                  | 0.270                 | 0.314 | 0.779    | 0.0186           | <i>ITGAM</i>             |                       | <b>1f</b> |           |
|                          |                  | 16          | p11.2             | rs7193943             | 31271063   | C                  | 0.259                 | 0.304 | 0.759    | 0.0137           | <i>ITGAM</i>             |                       | <b>1f</b> |           |
|                          |                  | 16          | p11.2             | <b>rs9938063</b>      | 31302938   | C                  | 0.194                 | 0.118 | 1.394    | 0.0138           | <i>ITGAM</i>             | intron                | 5         |           |
|                          |                  | 16          | p11.2             | <b>rs9888879</b>      | 31310372   | C                  | 0.194                 | 0.120 | 1.349    | 0.0270           | <i>ITGAM</i>             | intron                | 4         |           |
|                          |                  | 16          | p11.2             | <b>rs1143683</b>      | 31336888   | A                  | 0.233                 | 0.153 | 1.462    | 2.99E-03         | <i>ITGAM</i>             | exon-missense         | 4         |           |
|                          |                  | 16          | p11.2             | rs4077810             | 31340909   | T                  | 0.268                 | 0.313 | 0.777    | 0.0209           | <i>ITGAM</i>             | intron                | <b>1f</b> |           |
|                          |                  | 16          | p11.2             | rs4075052             | 31348233   | T                  | 0.269                 | 0.315 | 0.766    | 0.0145           | <i>ITGAM</i>             |                       | 6         |           |
|                          |                  | <b>IRF8</b> | 16                | q24.1                 | rs4843861  | 85950976           | A                     | 0.319 | 0.266    | 1.309            | 0.0169                   | <i>IRF8</i>           | intron    | <b>3a</b> |
|                          |                  |             | 16                | q24.1                 | rs13338943 | 85952951           | T                     | 0.132 | 0.109    | 1.356            | 0.0428                   | <i>IRF8</i>           | intron    | 5         |
|                          | 16               |             | q24.1             | rs385344              | 85967604   | C                  | 0.306                 | 0.273 | 1.276    | 0.0212           | <i>IRF8</i>              |                       | 6         |           |
| 16                       | q24.1            |             | rs2934498         | 85968282              | C          | 0.306              | 0.275                 | 1.258 | 0.0297   | <i>IRF8</i>      |                          | 5                     |           |           |
| 16                       | q24.1            |             | <b>rs11648084</b> | 85972598              | T          | 0.283              | 0.320                 | 0.797 | 0.0355   | <i>IRF8</i>      |                          | 5                     |           |           |
| 16                       | q24.1            |             | <b>rs11644034</b> | 85972612              | T          | 0.181              | 0.232                 | 0.726 | 9.18E-03 | <i>IRF8</i>      |                          | 5                     |           |           |
| 16                       | q24.1            |             | <b>rs12711490</b> | 85973028              | G          | 0.181              | 0.229                 | 0.735 | 0.0133   | <i>IRF8</i>      |                          | ND                    |           |           |
| 16                       | q24.1            |             | <b>rs12598434</b> | 85973059              | T          | 0.283              | 0.318                 | 0.807 | 0.0469   | <i>IRF8</i>      |                          | ND                    |           |           |
| 16                       | q24.1            |             | rs305097          | 85977911              | A          | 0.314              | 0.279                 | 1.249 | 0.0327   | <i>IRF8</i>      |                          | 5                     |           |           |
| 16                       | q24.1            |             | rs11642873        | 85991705              | G          | 0.152              | 0.211                 | 0.745 | 0.0229   | <i>IRF8</i>      |                          | 4                     |           |           |
| 16                       | q24.1            |             | rs11642511        | 86003392              | G          | 0.328              | 0.383                 | 0.804 | 0.0307   | <i>IRF8</i>      |                          | 4                     |           |           |
| 16                       | q24.1            |             | rs9308364         | 86003446              | G          | 0.501              | 0.443                 | 1.284 | 0.0122   | <i>IRF8</i>      |                          | 4                     |           |           |
| 16                       | q24.1            |             | rs4843329         | 86004239              | T          | 0.486              | 0.427                 | 1.269 | 0.0150   | <i>IRF8</i>      |                          | 4                     |           |           |

Previously identified SLE loci/genes examined in this study included: (a) 2q32/*STAT4*, 3p14/*PXK*, 5q33-35/*PTTG1-MIR146A*, 6q21/*PRDM1-ATG5*, 6q23/*OLIG3-TNFAIP3*, 7q32/*IRF5-TNPO3*, 8p23/*XKR6-BLK*, 8q12-13/*LYN*, 11p15/*PHRF1-IRF7*, and 16p11/*ITGAM-ITGAD* loci identified in 3 high-density GWAS of European-descent subjects (PMIDs: 19165918, 18204446, 18204098), (b) 4q24/*BANK1* locus identified in a low-density GWAS of European-descent subjects (PMID: 18204447), (c) 1q25/*TNFSF4*, 2p22/*RASGRP3*, 2p13/*TET3*, 3q13/*CD80*, 4q21/*AFF1*, 5q33/*TNIP1*, 7p12/*IKZF1*, 7q11/*HIP1*, 10q11/*WDFY4*, 10q21/*ARID5B*, 11q23/*ETS1*, 12p13-12/*CREBL2-CDKN1B*, 12q23/*DRAM1*, 12q24/*SLC15A4*, 13q13/*ELF1*, 16p11/*PRKCB*, and 22q11/*HIC2-UBE2L3* loci identified in Chinese or Japanese GWAS or post-GWAS follow-up studies (PMIDs: 19838193, 22291604, 21134959, 20169177, 21044949, 23273568), some of which also reported in individuals of European ancestry, and (d) 1p13/*PTPN22*, 1q23/*FCGR2A*, 1q25/*NCF2*, 1q31/*IL10*, 2q24/*IFIH1*, 3q13/*TMEM39A* (near *CD80* already mentioned above), 6p21/*SNRPC-UHRF1BP1*, 7p15/*JAZF1*, 11p13/*PDHX-CD44*, 16q24/*IRF8*, and 19p13/*TYK2* loci identified by post-GWAS follow-up and large studies that included subjects of European ancestry (PMIDs: 22046141, 19838195, 19493061, 22203994, 21194677, 22464253, 21379322).

\***Bold/Underlined**: Replicated genome-wide significant SNP (**index** or **proxy** with  $r^2 \geq 0.8$  according to <http://www.broadinstitute.org/mpg/snap/>).

\*\*P-value for additive genetic model, adjusted for relevant covariates (please see the methods section).

\*\*\*The nearest gene within  $\pm 500$  kb (<http://www.genome.ucsc.edu/>).

\*\*\*\*For the SNPs located within the gene (<http://www.ncbi.nlm.nih.gov/projects/SNP/>).

\*\*\*\*\*Please see the methods section and <http://www.regulomedb.org/help/>; ND: No Data.



Figure S1

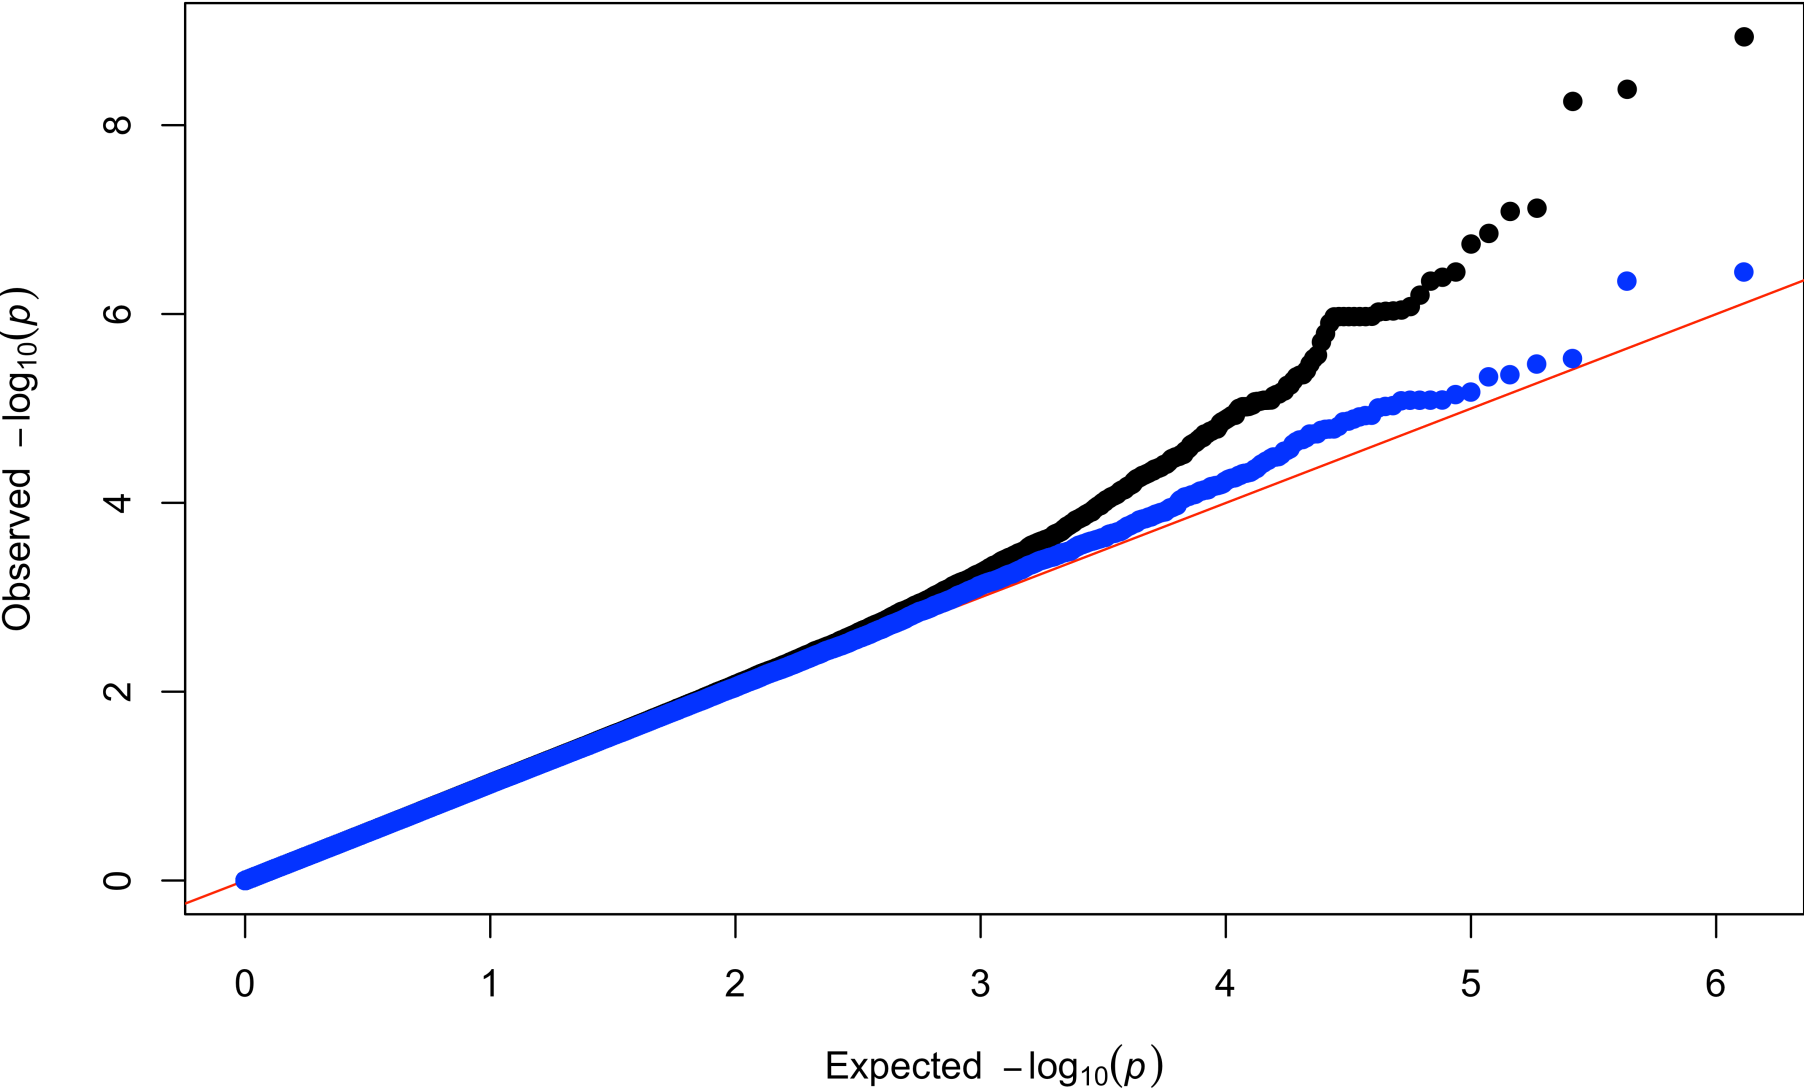

Figure S2

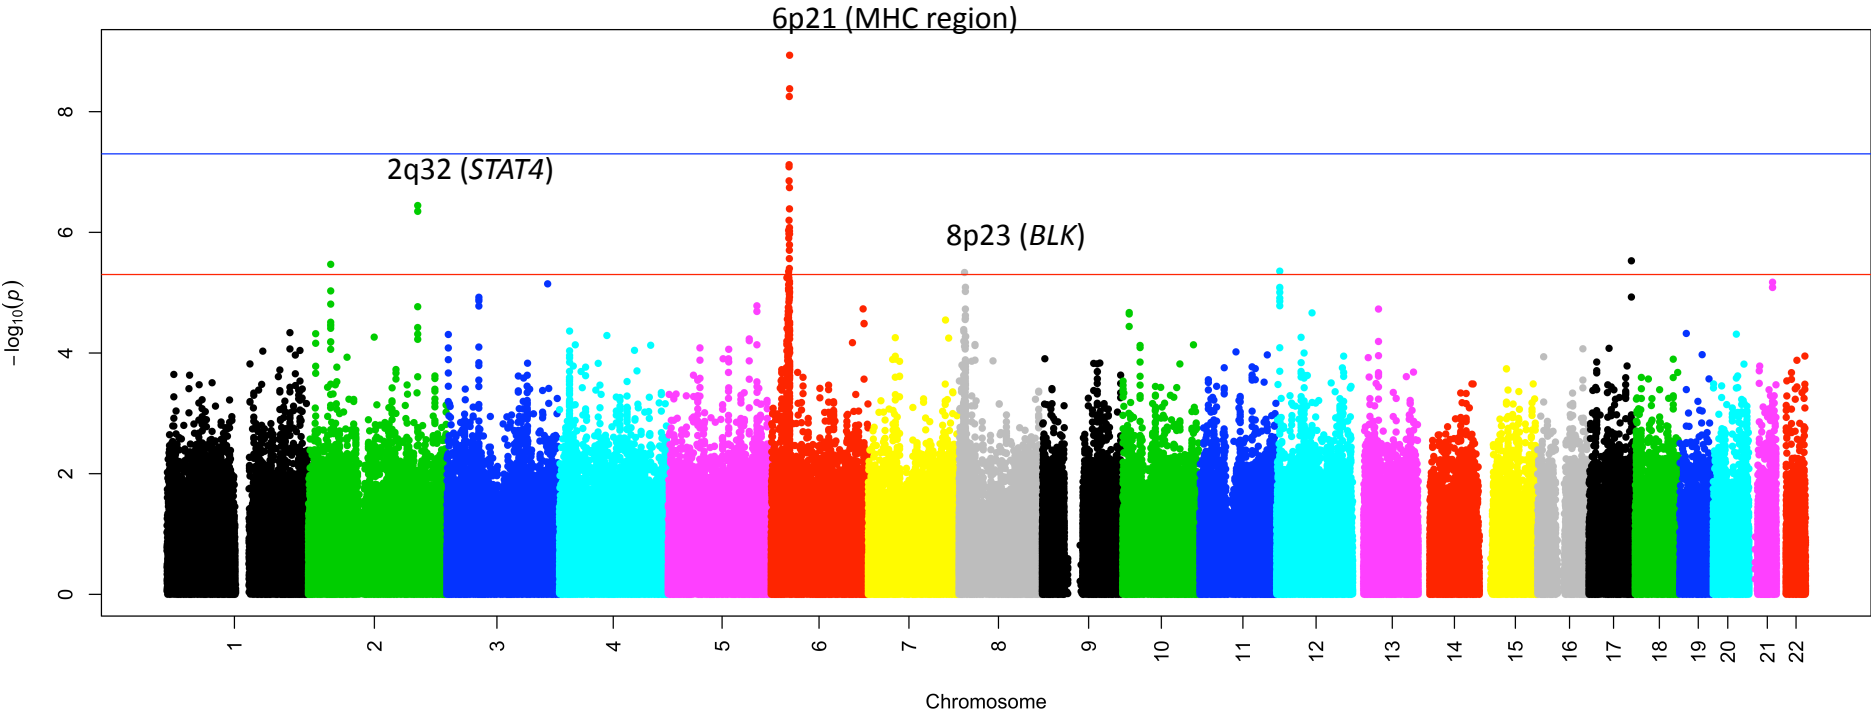

Figure S3

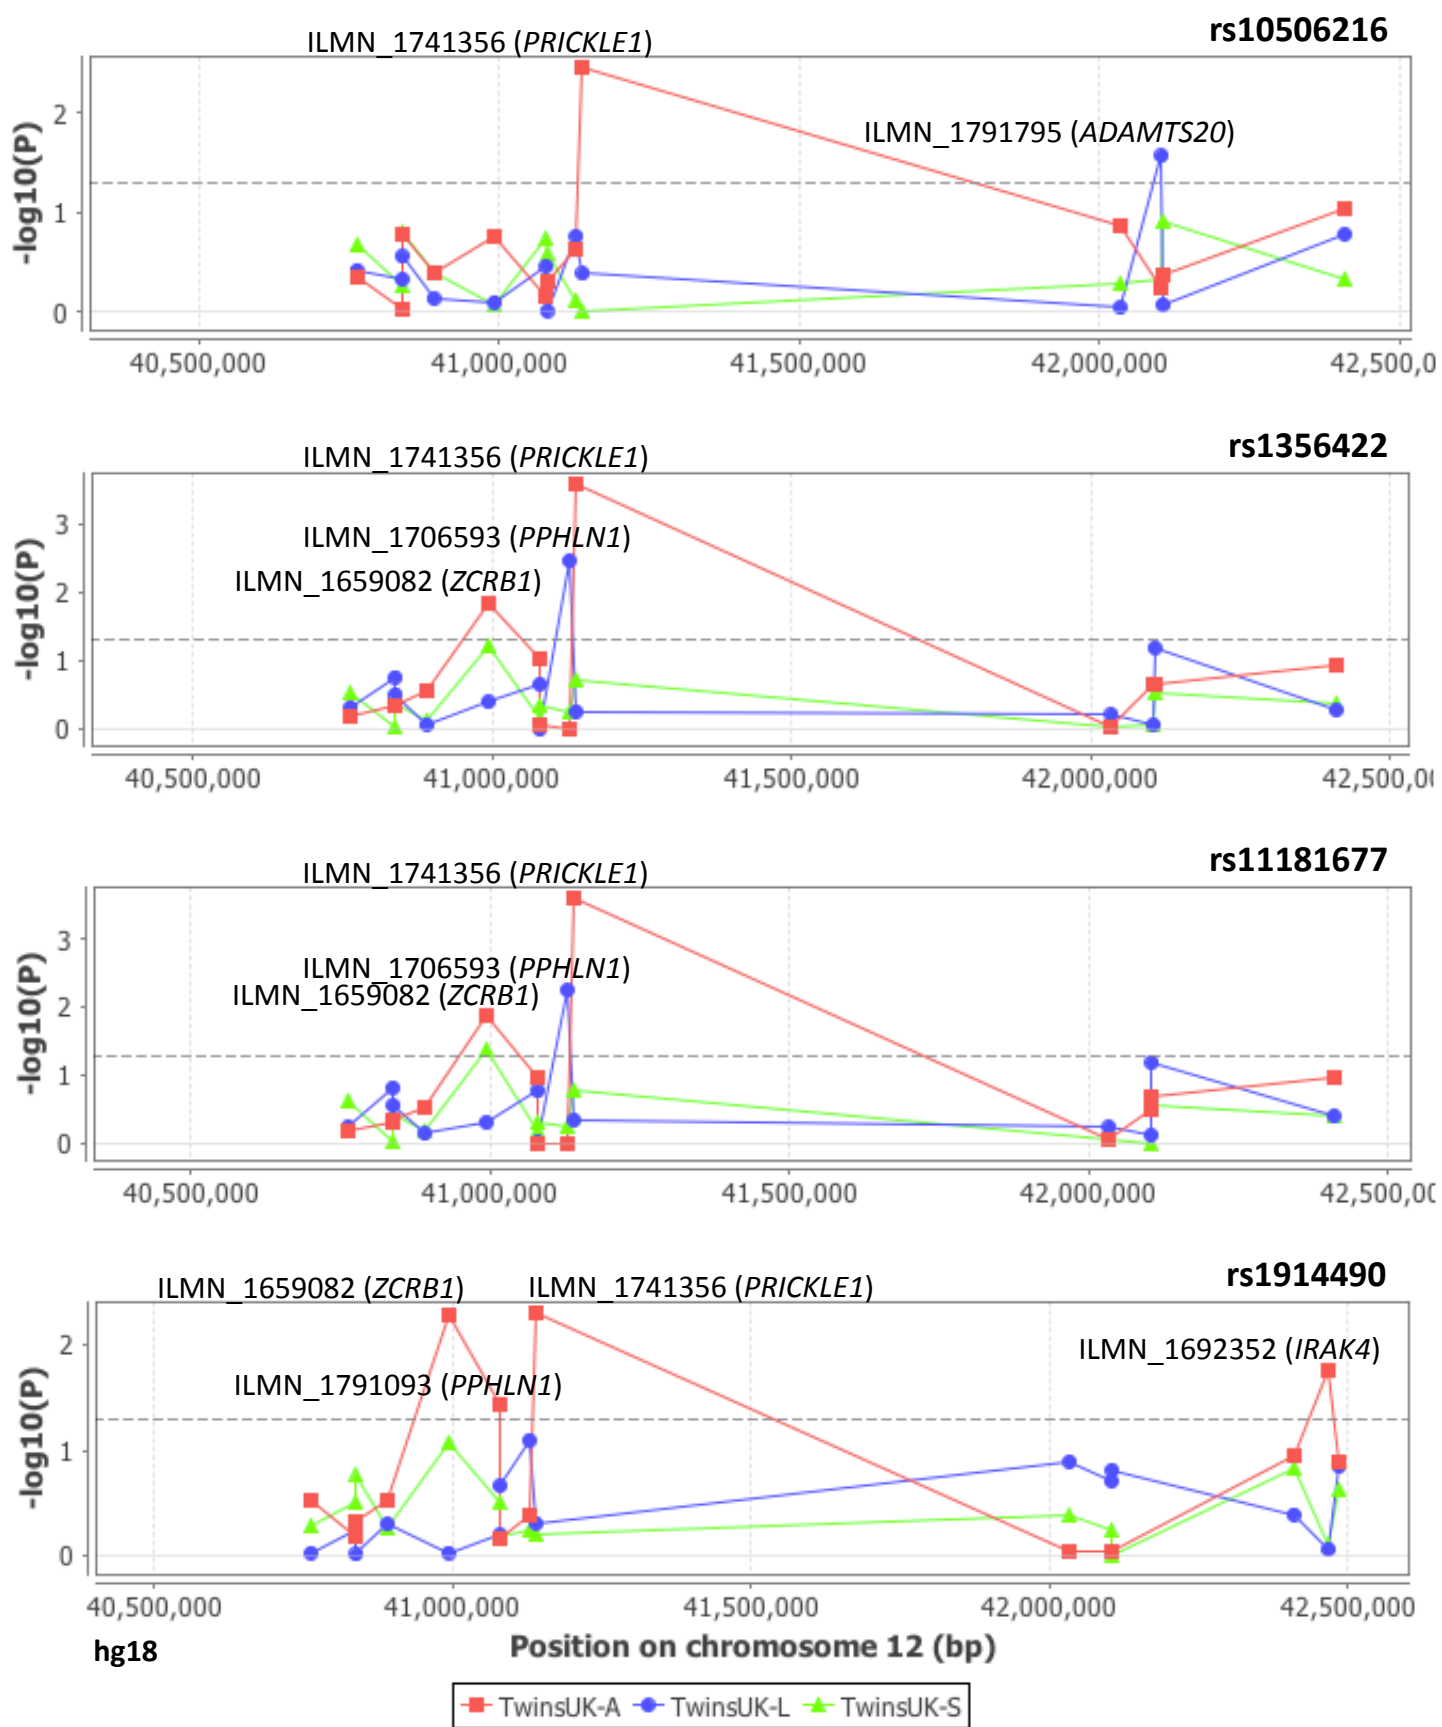

Figure S4

TwinsUK-A

ILMN\_1659082 / ENSG00000139168 / ZCRB1

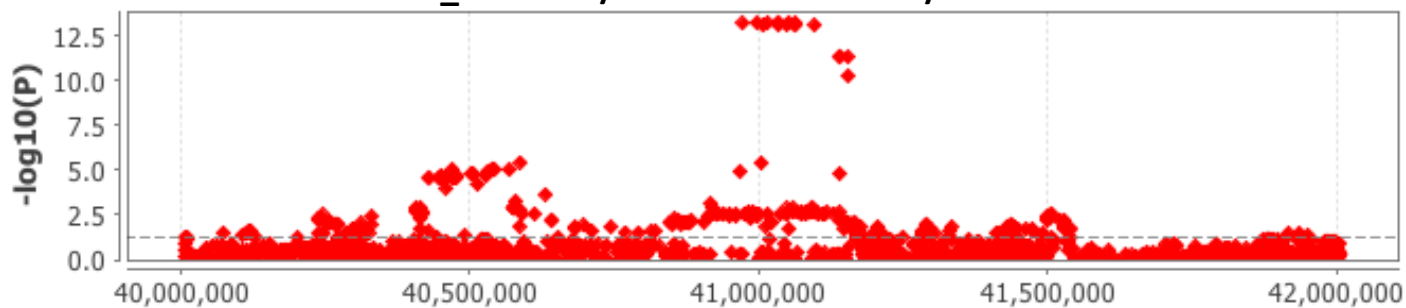

ILMN\_1791093 / ENSG00000134283 / PPHLN1

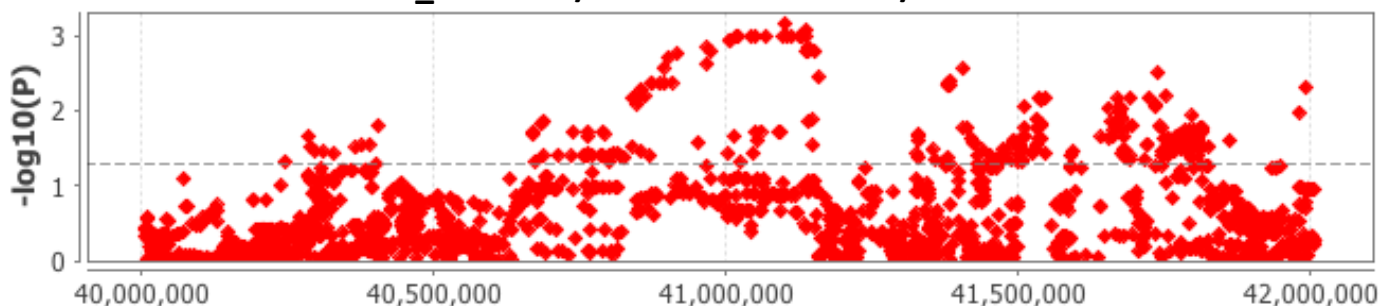

ILMN\_1741356 / ENSG00000139174 / PRICKLE1

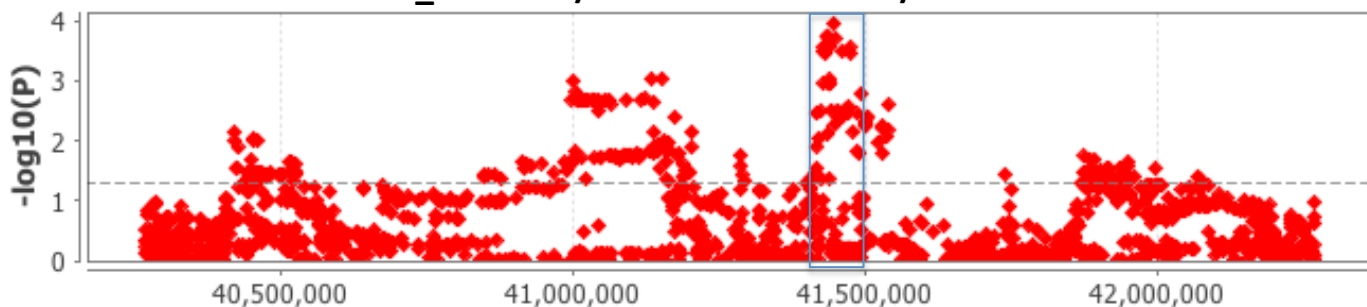

ILMN\_1791795 / ENSG00000173157 / ADAMTS20

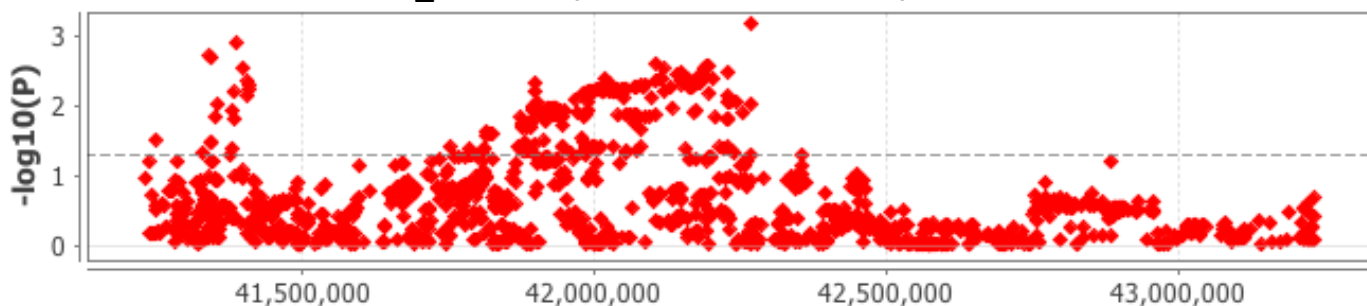

ILMN\_1692352 / ENSG00000198001 / IRAK4

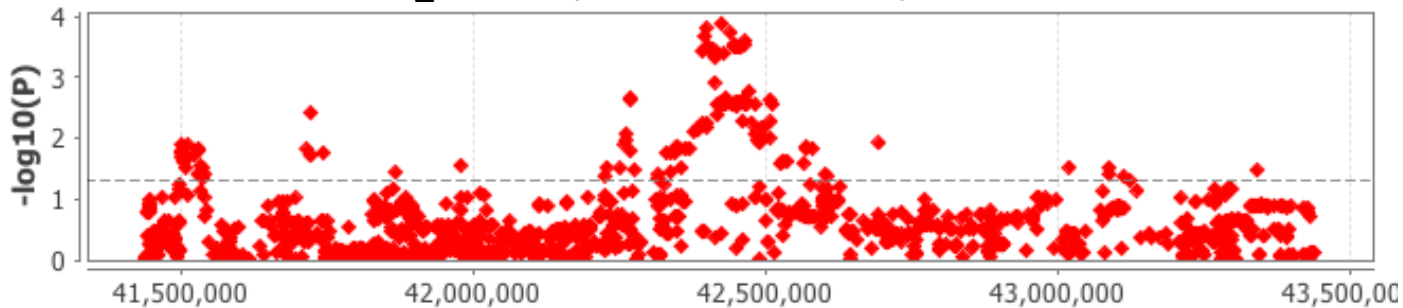

hg18

Position on chromosome 12 (bp)

Figure S5

ILMN\_1659082 / ENSG00000139168 / ZCRB1

TwinsUK-L

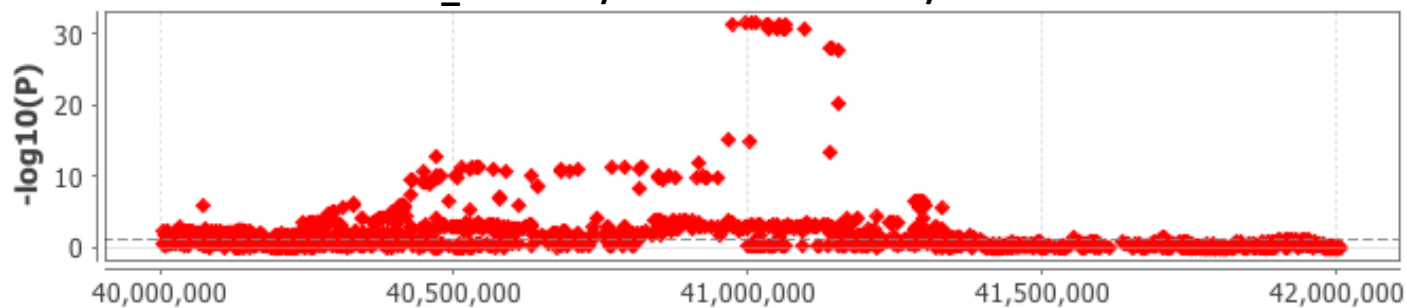

ILMN\_1706593 / ENSG00000134283 / PPHLN1

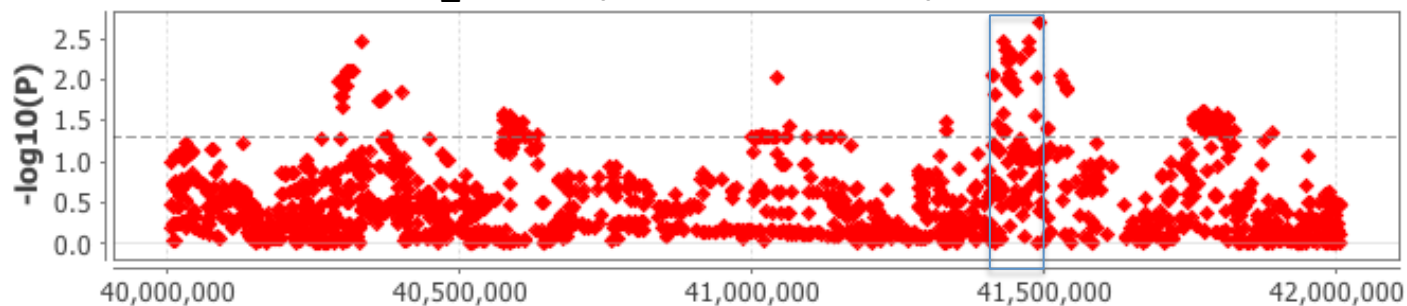

ILMN\_1741356 / ENSG00000139174 / PRICKLE1

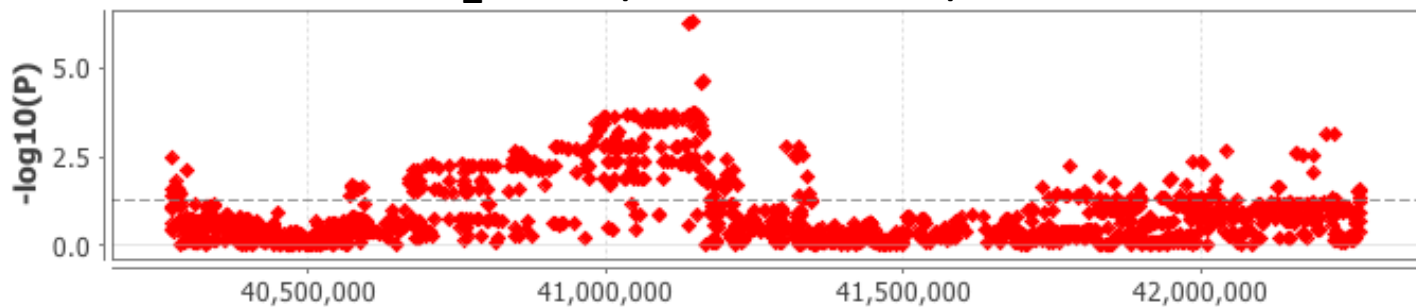

ILMN\_1791795 / ENSG00000173157 / ADAMTS20

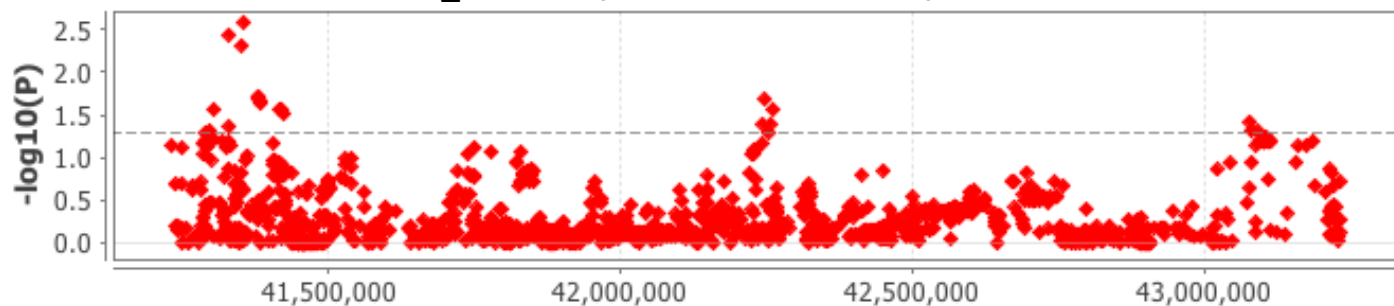

ILMN\_1692352 / ENSG00000198001 / IRAK4

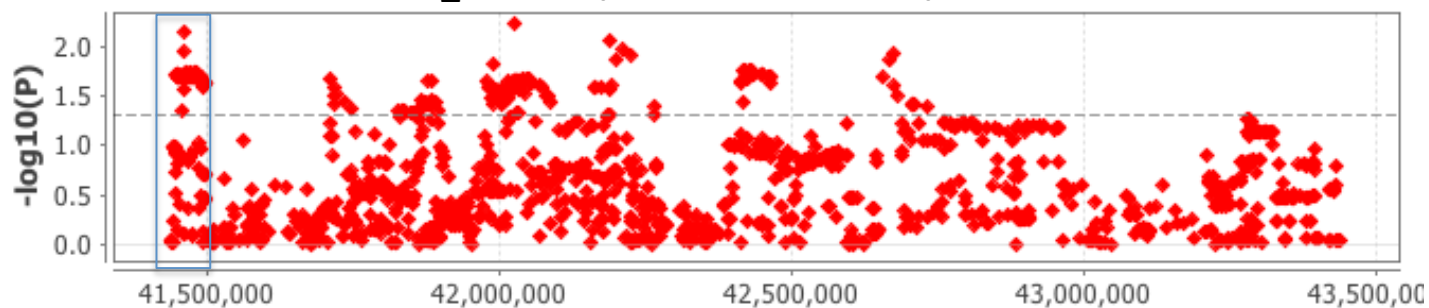

hg18

Position on chromosome 12 (bp)

Figure S6

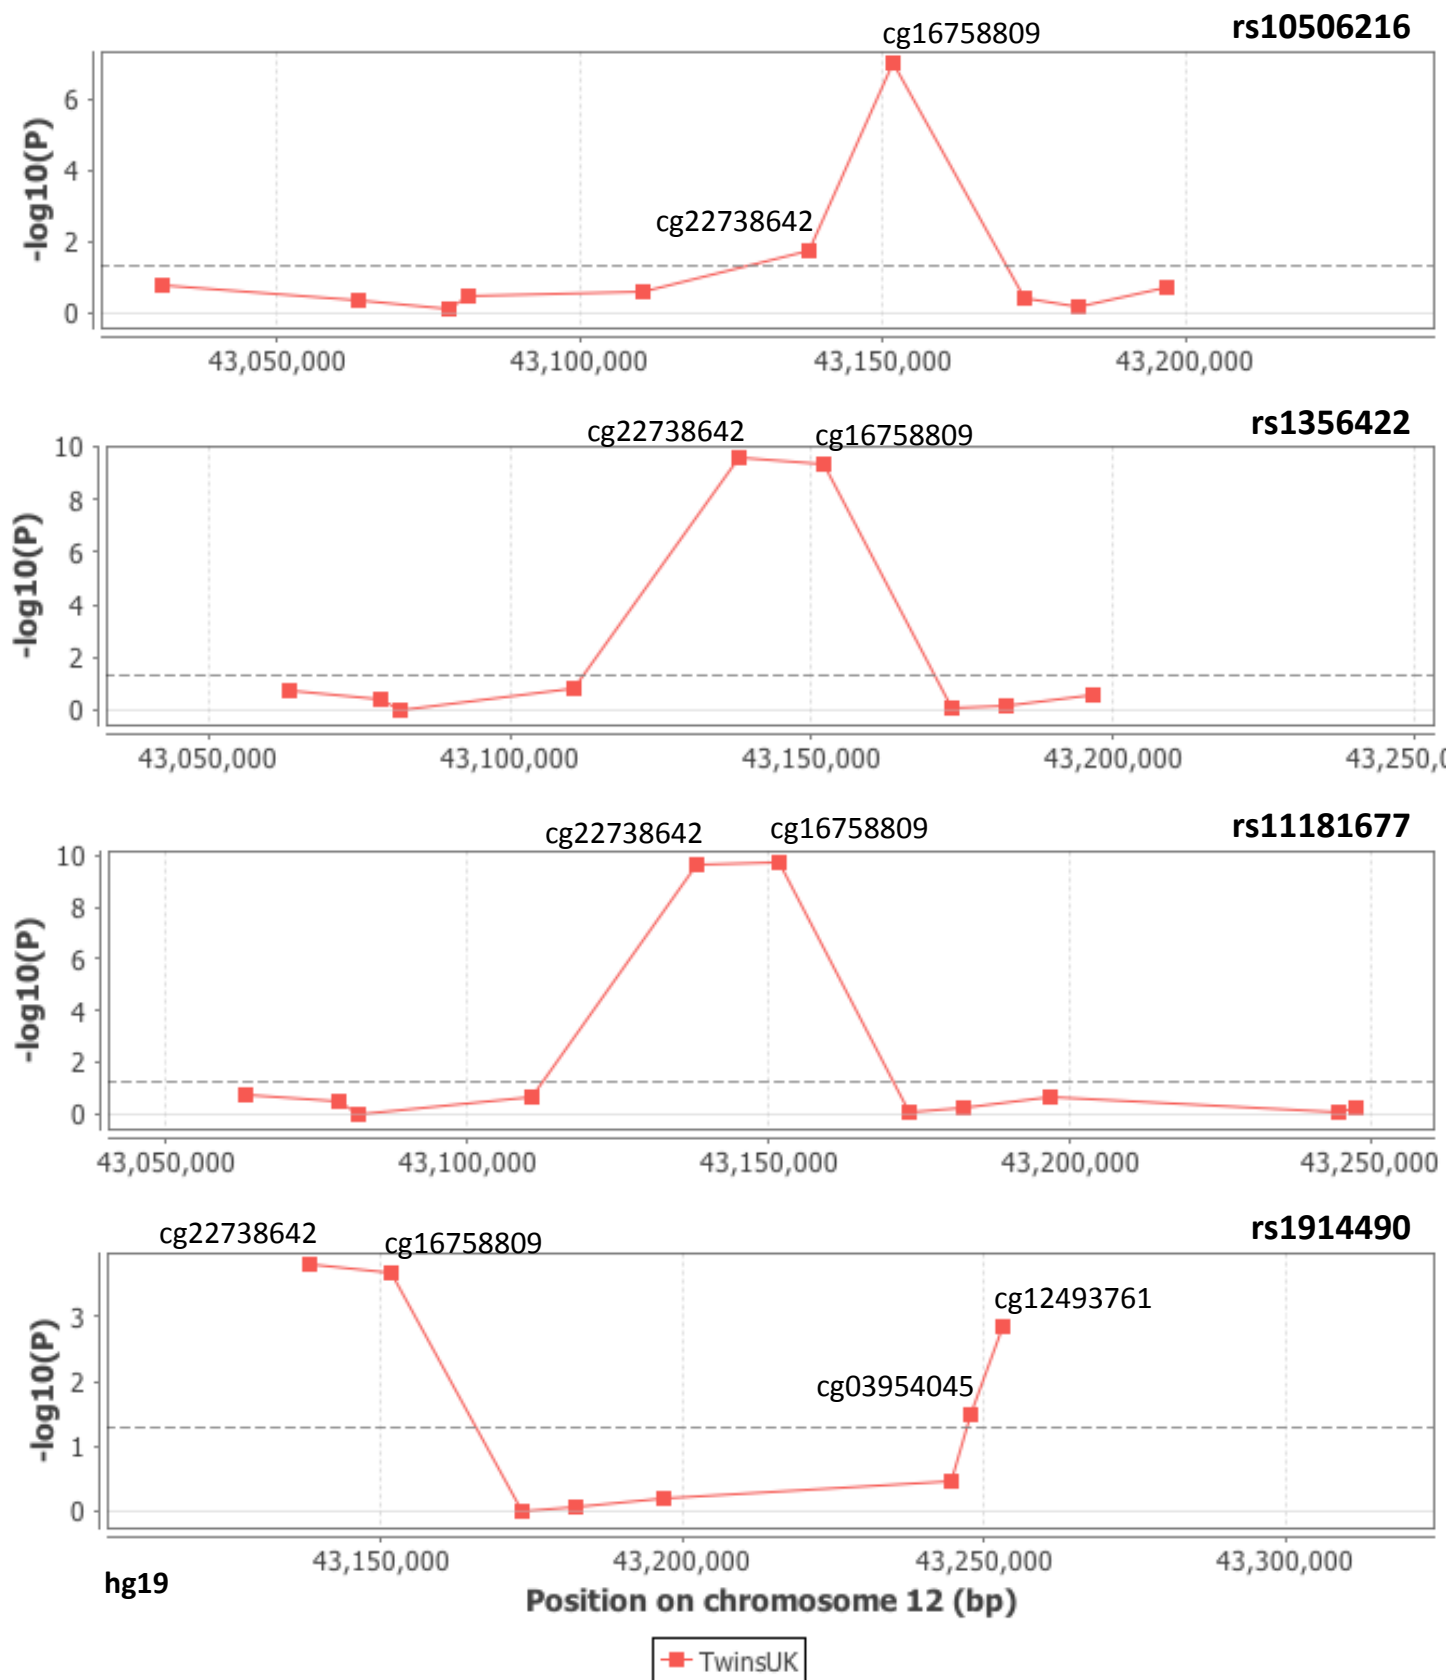

**Figure S7**

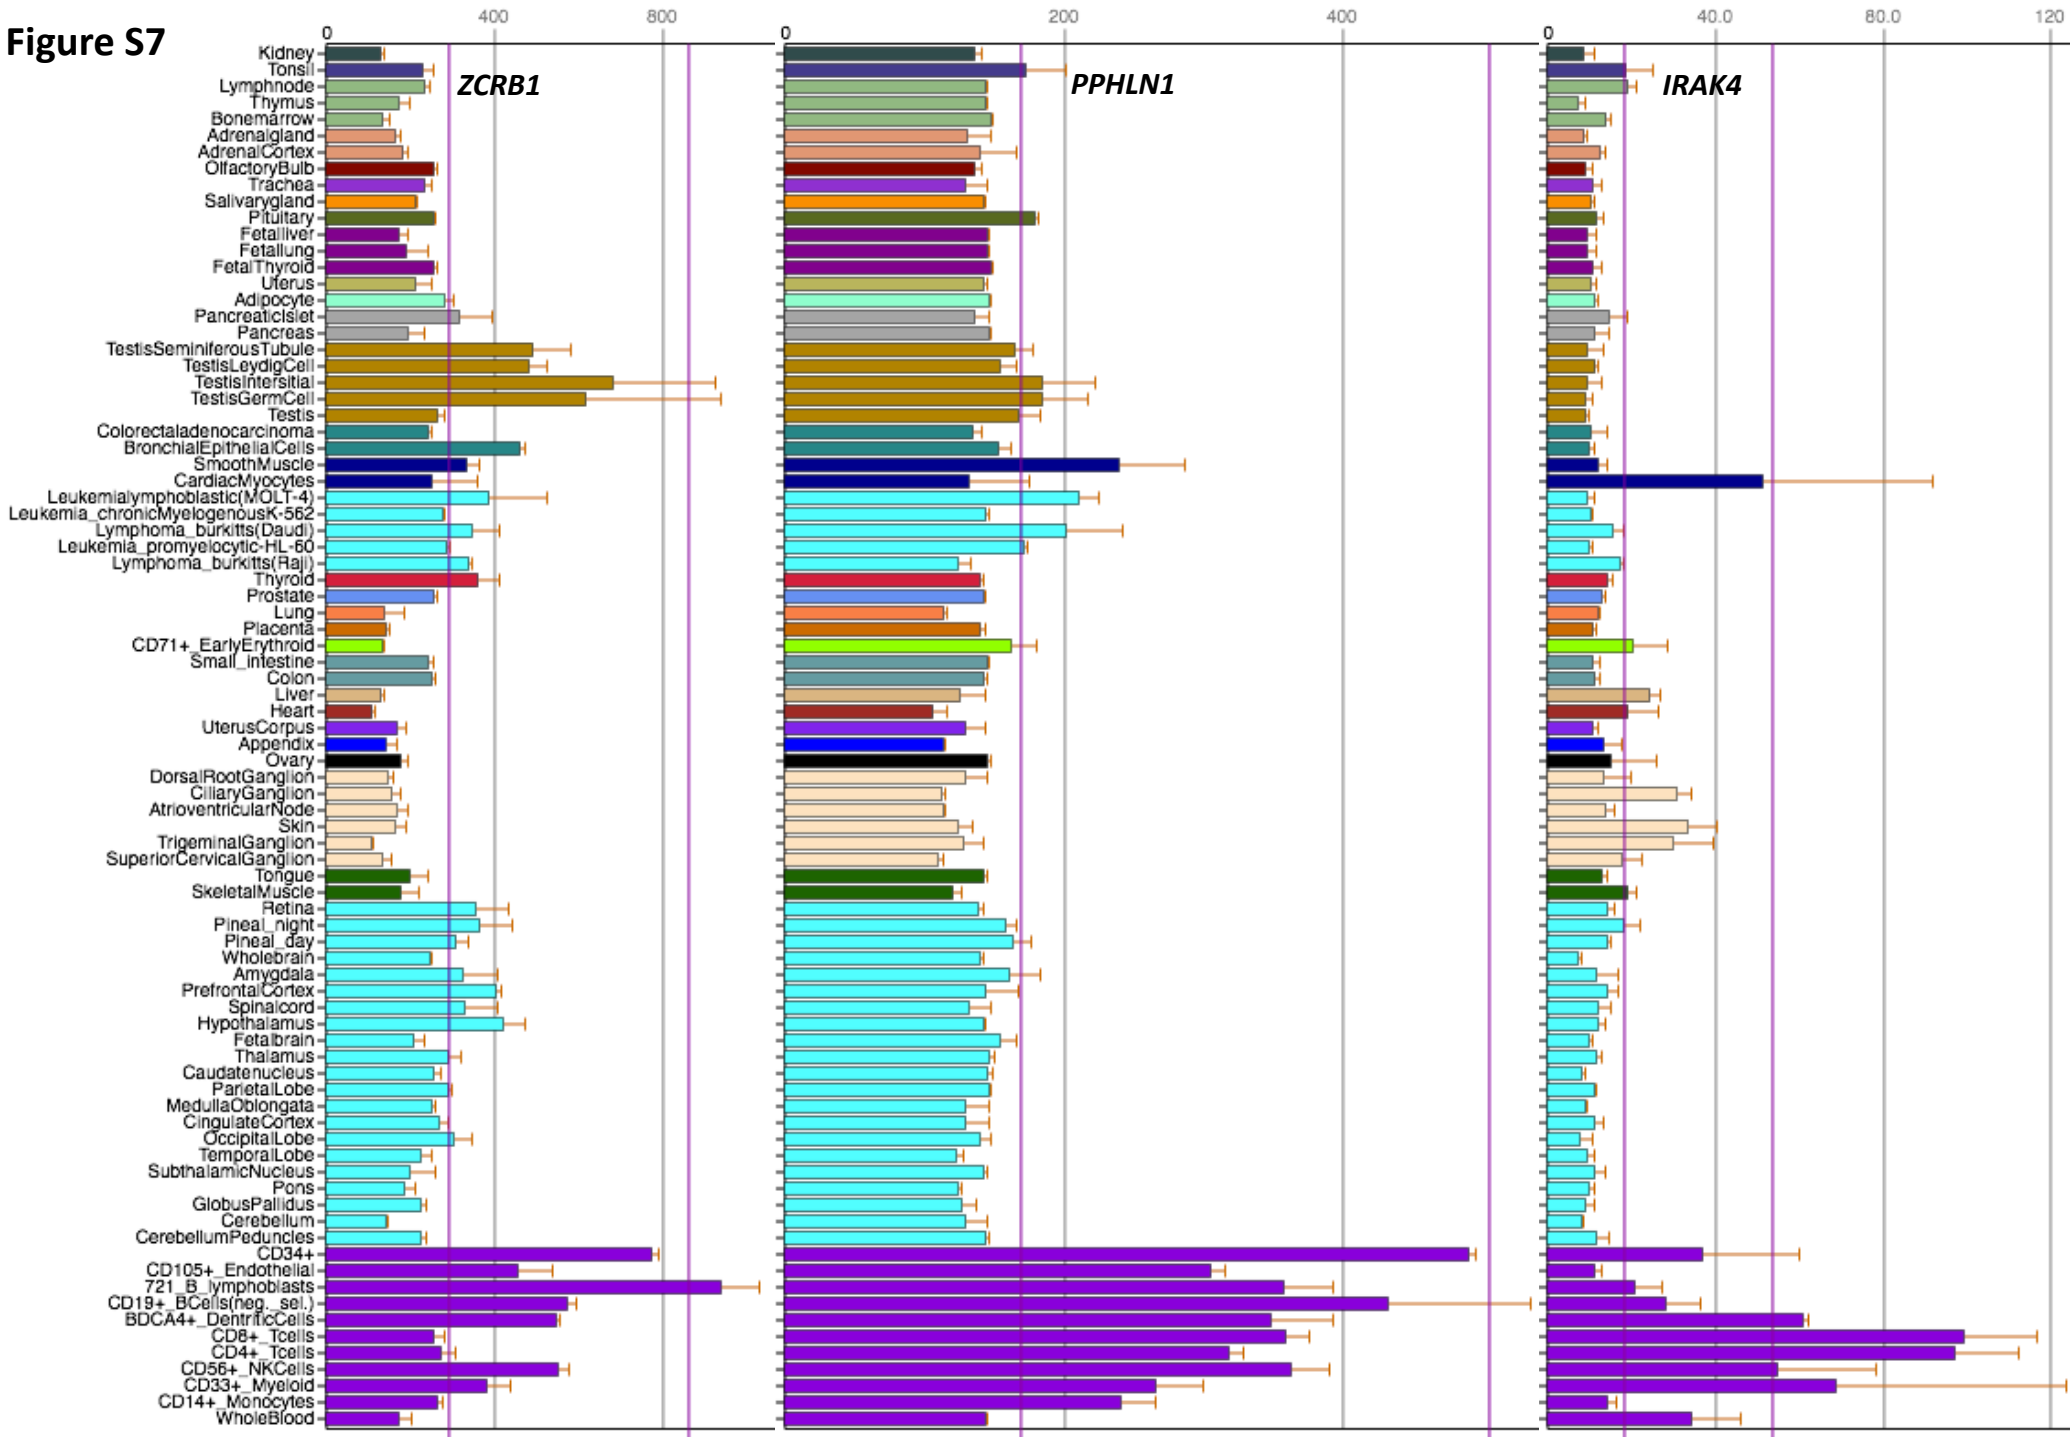

Figure S8

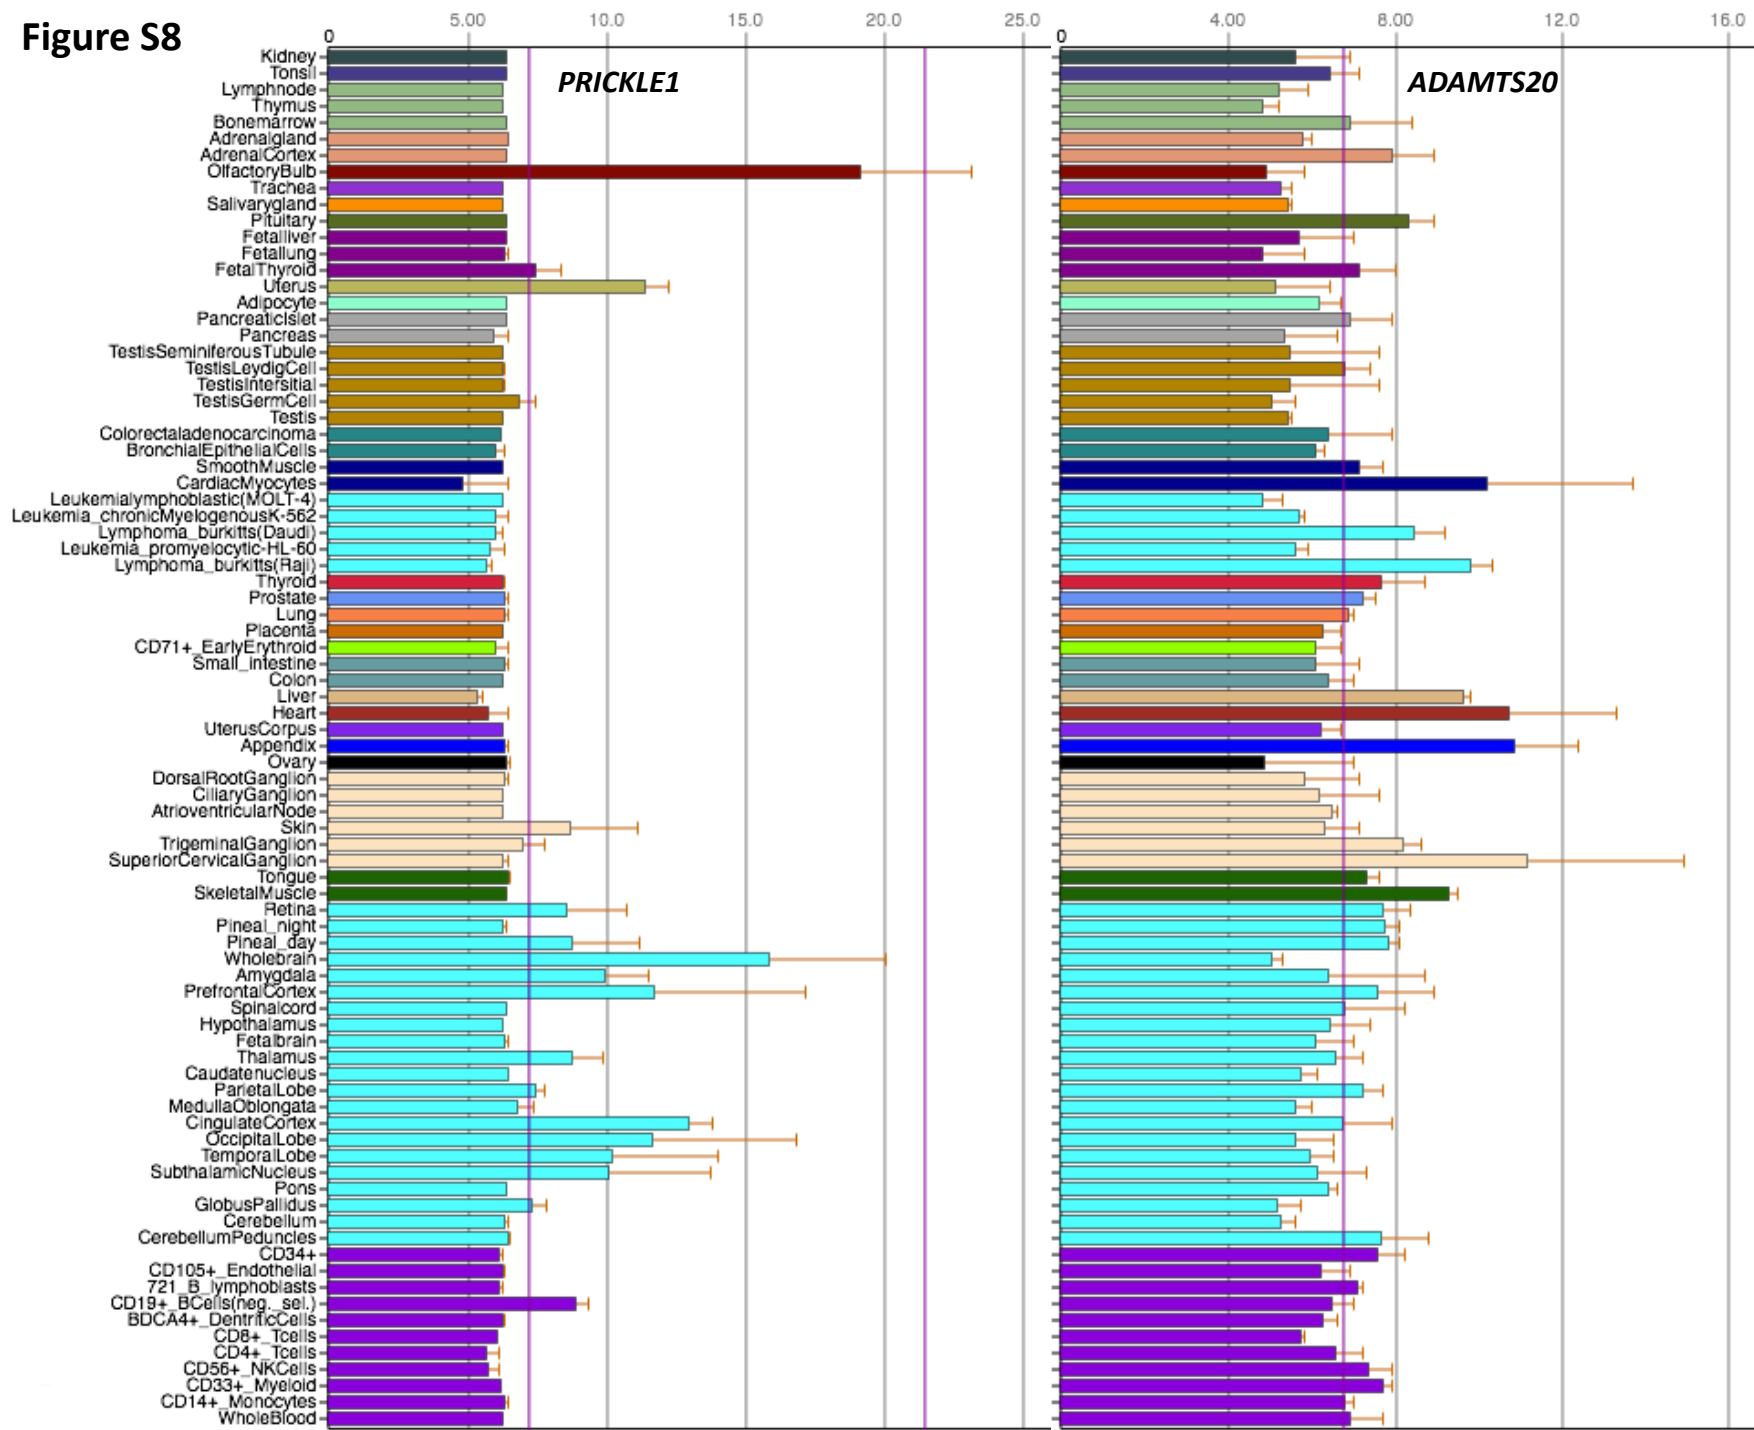



Figure S9

LD threshold,  $r^2$  (select NA to only show query variants):

1000G Phase 1 population for LD calculation:
  AFR
  AMR
  ASN
  EUR

Source for epigenomes:
  ENCODE
  Roadmap

Mammalian conservation algorithm:
  GERP
  SiPhy-omega
  both

Show position relative to:
  GENCODE genes
  RefSeq genes
  both

Condense lists in table longer than:

Condense indel oligos longer than:

Background set for enhancer enrichment analysis:

Output mode:
  HTML
  Text

Enhancer enrichment analysis

| Cell type |                              | All enhancers |     |      |          | Strongest enhancers |     |       |          |
|-----------|------------------------------|---------------|-----|------|----------|---------------------|-----|-------|----------|
| ID        | Description                  | Obs           | Exp | Fold | p        | Obs                 | Exp | Fold  | p        |
| H1        | H1 Cell Line                 | 4             | 0.3 | 13.7 | 9.5E-5   | 3                   | 0   | 123.1 | 1.0E-6   |
| HSMM      | skeletal muscle myoblasts    | 5             | 0.4 | 13.9 | 7.0E-6   | 2                   | 0.2 | 12.8  | 0.009691 |
| HMEC      | mammary epithelial cells     | 4             | 0.4 | 9.6  | 0.000383 | 0                   | 0.2 | 0     | 1        |
| GM12878   | B-lymphocyte, lymphoblastoid | 3             | 0.3 | 9.1  | 0.003121 | 3                   | 0.1 | 25.6  | 0.000157 |
| NHEK      | epidermal keratinocytes      | 4             | 0.4 | 11.1 | 0.00022  | 3                   | 0.2 | 19    | 0.000373 |
